# Supplementary material
Source: publisher site journal article supplement (https://www.dovepress.com/article/485532)
Supplement: Supplementary file 1 [file get_supplementary_file.php]

**Supplementary Table S1** Association of necropsy and histological parameters with microbiome clusters. AST, aspartate aminotransferase; ALT, alanine aminotransferase. Data are presented as mean (range) – median. *p*-values were determined using unpaired t-test or Mann-whitney test, comparing each cluster to the rest of the study population. Significant results (*p*<0.05) are in bold.

| **Variable** | **Cluster A (n=4)** | ***p*** | **Cluster B (n=11)** | ***p*** | **Cluster C (n=8)** | ***p*** |
| --- | --- | --- | --- | --- | --- | --- |
| **Liver weight (g)** | 3.21 (2.60-3.84) – 3.21 | 0.969 | 3.31 (2.11-7.79) – 2.75 | 0.133 | 4.08 (2.64-6.33) – 3.37 | 0.131 |
| **Liver:Body weight** | 0.12 (0.11-0.13) – 0.12 | 0.999 | 0.13 (0.09-0.29) – 0.11 | 0.104 | 0.17 (0.10-0.28) – 0.14 | 0.087 |
| **Cecum weight (g)** | 0.64 (0.51-0.76) – 0.65 | 0.060 | 0.54 (0.39-0.69) – 0.54 | 0.992 | 0.50 (0.28-0.65) – 0.53 | 0.144 |
| **Cecum:Body weight** | 0.03 (0.02-0.03) – 0.03 | 0.071 | 0.02 (0.02-0.03) – 0.02 | 0.930 | 0.02 (0.01-0.02) – 0.02 | 0.055 |
| **Colon length (cm)** | 6.8 (5.6-7.5) – 7.0 | 0.777 | 6.9 (5.8-7.8) – 6.9 | 0.871 | 6.9 (6.2-7.7) – 6.7 | 0.952 |
| **Tumor number** | 2.5 (0-6) – 2.0 | 0.825 | **1.5 (0-6) – 1.0** | **0.015** | **6.9 (0-16) – 7.5** | **0.005** |
| **Tumor burden (mm3)** | 126.7 (0-398.6) – 54.0 | 0.570 | 547.0 (0-4774) – 11.2 | 0.143 | **1418.0 (0-3476) – 603.8** | **0.040** |
| **Liver histology** |  |  |  |  |  |  |
| Modified NAFL score | 2.3 (1-3.5) – 2.3 | 0.522 | 2.8 (1-4.5) – 2.8 | 0.487 | 3.4 (0.5-5) – 3.5 | 0.212 |
| Fibrosis | 0.0 (0-0) – 0.0 | 0.198 | 0.5 (0-1.5) – 0.5 | 0.871 | 0.6 (0-1.5) – 0.5 | 0.496 |
| Steatosis- macrovesicular | 0.0 (0-0) – 0.0 | 0.362 | 0.3 (0-1) – 0.0 | 0.727 | 0.4 (0-1) – 0.0 | 0.339 |
| Steatosis- microvesicular | 2.0 (1-3) – 2.0 | 0.362 | 2.0 (1-3) – 2.0 | 0.727 | 2.0 (0-3) – 2.0 | 0.339 |
| Inflammation | 0.3 (0-0.5) – 0.3 | 0.565 | **0.2 (0-0.5) – 0.0** | **0.017** | **0.6 (0.5-1) – 0.5** | **0.003** |
| Ballooning | 0.0 (0-0) – 0.0 | 0.226 | 0.4 (0-1) – 0.3 | 0.626 | 0.4 (0-1) – 0.5 | 0.778 |
| Bile ductural reaction | 0.3 (0-0.5) – 0.3 | 0.565 | **0.2 (0-0.5) – 0.0** | **0.017** | **0.6 (0.5-1) – 0.5** | **0.003** |
| **Blood test** |  |  |  |  |  |  |
| AST (U/L) | 606 (138-1524) – 381 | 0.397 | 276 (78-750) – 216 | 0.964 | 219.8 (108-498) – 153 | 0.537 |
| ALT (U/L) | 232.5 (72-432) – 213 | 0.516 | 144.5 (60-300) – 126 | 0.183 | 243 (84-618) – 171 | 0.400 |

**Supplementary Table S2** Association of necropsy and histological parameters with RNAseq gene expression clusters. BDR, bile ductular reaction;AST, aspartate aminotransferase; ALT, alanine aminotransferase. Data are presented as mean (range) – median. *p*-values were determined using unpaired t-test or Mann-whitney test, comparing each cluster to the rest of the study population. Significant results (*p*<0.05) are in bold.

| **Variable** | **Cluster A (n=8)** | ***p*** | **Cluster B (n=7)** | ***p*** | **Cluster C (n=10)** | ***p*** |
| --- | --- | --- | --- | --- | --- | --- |
| **Liver weight (g)** | 2.76 (2.11-3.84) – 2.78 | 0.051 | **5.19 (3.36-7.79) – 5.30** | **<0.001** | 2.93 (2.38-4.00) – 2.76 | 0.133 |
| **Liver:Body weight** | **0.11 (0.09-0.13) – 0.11** | **0.038** | **0.21 (0.13-0.29) – 0.23** | **<0.001** | 0.11 (0.09-0.14) – 0.11 | 0.129 |
| **Cecum weight (g)** | 0.60 (0.49-0.76) – 0.60 | 0.077 | 0.50 (0.28-0.69) – 0.48 | 0.124 | 0.54 (0.39-0.65) – 0.54 | 0.795 |
| **Cecum:Body weight** | 0.02 (0.02-0.03) – 0.02 | 0.070 | 0.02 (0.01-0.03) – 0.02 | 0.122 | 0.02 (0.02-0.03) – 0.02 | 0.769 |
| **Colon length (cm)** | 7.1 (6.4-7.8) – 7.1 | 0.236 | 6.9 (5.8-7.7) – 7.1 | 0.858 | 6.6 (5.6-7.8) – 6.6 | 0.174 |
| **Tumor number** | **1.4 (0-6) – 0.5** | **0.033** | **7.0 (1-16) – 7.0** | **0.008** | 2.5 (0-8) – 2.0 | 0.753 |
| **Tumor burden (mm3)** | **117.7 (0-398.6) – 4.2** | **0.034** | **2264 (18.7-4774) – 2914** | **<0.001** | 151.3 (0-590.6) – 69.95 | 0.356 |
| **Liver histology** |  |  |  |  |  |  |
| Modified NAFL score | 3.1 (1-4.5) – 3.3 | 0.577 | 3.4 (0.5-6.5) – 3.5 | 0.831 | 3.5 (1.5-6) – 3.8 | 0.738 |
| Fibrosis | **0.3 (0-1.5) – 0.0** | **0.046** | 0.9 (0-3) – 0.5 | 0.358 | 0.7 (0-1.5) – 0.5 | 0.291 |
| Steatosis- macrovesicular | 0.4 (0-1) – 0.0 | 0.900 | 0.4 (0-1) – 0.0 | 0.999 | 0.5 (0-2) – 0.0 | 0.807 |
| Steatosis- microvesicular | 2.1 (1-3) – 2.0 | 0.499 | 1.7 (0-3) – 2.0 | 0.394 | 2.0 (1-3) – 2.0 | 0.988 |
| Inflammation | 0.3 (0-0.5) – 0.3 | 0.123 | 0.7 (0-1.5) – 0.5 | 0.053 | 0.4 (0-1) – 0.5 | 0.953 |
| Ballooning | 0.2 (0-1) – 0.0 | 0.143 | 0.6 (0-2) – 0.5 | 0.643 | 0.5 (0-1) – 0.5 | 0.358 |
| Bile ductural reaction | 0.3 (0-0.5) – 0.3 | 0.066 | 0.7 (0-1.5) – 0.5 | 0.084 | 0.5 (0-1) – 0.5 | 0.920 |
| **Blood tests** |  |  |  |  |  |  |
| AST (U/L) | 387 (78-1524) – 183 | 0.602 | 236.6 (144-498) – 192 | 0.707 | 308.3 (108-750) – 183 | 0.887 |
| ALT (U/L) | 168 (60-432) – 102 | 0.231 | **279.4 (126-618) – 234** | **0.034** | 145.5 (72-300) – 126 | 0.436 |

**Supplementary Table S3** DEGs identified by DESeq2 of RNA-seq data from liver of female Hep*Pten-/-* mice (n=25). These include 706 upregulated DEGs and 134 down-regulated DEGs. Fold change and adjusted p values are shown. All genes had significant correlation with tumor burden as shown by Spearman’s coefficient correlation values and Benjamini-Hochberg adjusted p values (BH-p).

| **Gene_name** | **Ensembl_ID** | **Fold change** | **Adj p** | **rs** | **BH-p** |
| --- | --- | --- | --- | --- | --- |
| Fam83c | ENSMUSG00000074647 | 15.72 | 0.022 | 0.59 | 0.019 |
| Slc4a9 | ENSMUSG00000024485 | 13.08 | <0.001 | 0.73 | 0.003 |
| Rp1 | ENSMUSG00000025900 | 12.20 | 0.010 | 0.66 | 0.009 |
| Hoxc4 | ENSMUSG00000075394 | 9.58 | 0.008 | 0.55 | 0.030 |
| Ppp2r2c | ENSMUSG00000029120 | 9.29 | <0.001 | 0.74 | 0.003 |
| Spata18 | ENSMUSG00000029155 | 8.80 | 0.013 | 0.59 | 0.020 |
| Gm14226 | ENSMUSG00000084897 | 8.01 | 0.007 | 0.58 | 0.022 |
| Lrrc10b | ENSMUSG00000090291 | 6.57 | 0.022 | 0.59 | 0.019 |
| Tacstd2 | ENSMUSG00000051397 | 6.45 | 0.001 | 0.64 | 0.011 |
| Gm16136 | ENSMUSG00000089804 | 6.32 | 0.002 | 0.61 | 0.016 |
| Car12 | ENSMUSG00000032373 | 5.80 | 0.005 | 0.52 | 0.043 |
| Cdhr3 | ENSMUSG00000035860 | 5.47 | 0.046 | 0.55 | 0.031 |
| Ppfia3 | ENSMUSG00000003863 | 5.27 | 0.036 | 0.51 | 0.048 |
| Folh1 | ENSMUSG00000001773 | 5.11 | 0.002 | 0.59 | 0.020 |
| Insyn2b | ENSMUSG00000069911 | 5.05 | 0.002 | 0.67 | 0.007 |
| Ccdc187 | ENSMUSG00000048038 | 4.94 | 0.003 | 0.57 | 0.026 |
| Gm379 | ENSMUSG00000093916 | 4.90 | <0.001 | 0.59 | 0.019 |
| Tent5b | ENSMUSG00000046694 | 4.80 | 0.001 | 0.56 | 0.026 |
| Wnt10a | ENSMUSG00000026167 | 4.71 | 0.003 | 0.53 | 0.040 |
| Dkkl1 | ENSMUSG00000030792 | 4.58 | 0.018 | 0.51 | 0.047 |
| Gjb3 | ENSMUSG00000042367 | 4.34 | 0.023 | 0.56 | 0.026 |
| Cyp2s1 | ENSMUSG00000040703 | 4.28 | <0.001 | 0.69 | 0.006 |
| Scel | ENSMUSG00000022123 | 4.25 | 0.015 | 0.63 | 0.012 |
| Wnt7b | ENSMUSG00000022382 | 4.19 | <0.001 | 0.63 | 0.013 |
| Oit1 | ENSMUSG00000021749 | 4.18 | 0.001 | 0.70 | 0.005 |
| Krt80 | ENSMUSG00000037185 | 4.11 | <0.001 | 0.60 | 0.018 |
| Wnt7a | ENSMUSG00000030093 | 4.06 | 0.005 | 0.51 | 0.050 |
| Cytl1 | ENSMUSG00000062329 | 3.98 | 0.042 | 0.54 | 0.034 |
| Pof1b | ENSMUSG00000034607 | 3.96 | 0.001 | 0.59 | 0.020 |
| Tppp3 | ENSMUSG00000014846 | 3.95 | <0.001 | 0.68 | 0.006 |
| Mpig6b | ENSMUSG00000073414 | 3.95 | 0.004 | 0.66 | 0.008 |
| Tubb3 | ENSMUSG00000062380 | 3.94 | 0.002 | 0.56 | 0.027 |
| Fgf7 | ENSMUSG00000027208 | 3.93 | 0.016 | 0.51 | 0.048 |
| Prtn3 | ENSMUSG00000057729 | 3.88 | 0.001 | 0.52 | 0.044 |
| Pou3f1 | ENSMUSG00000090125 | 3.86 | 0.008 | 0.62 | 0.014 |
| Cd109 | ENSMUSG00000046186 | 3.84 | 0.014 | 0.51 | 0.049 |
| Glb1l2 | ENSMUSG00000036395 | 3.83 | 0.004 | 0.55 | 0.031 |
| Nxpe5 | ENSMUSG00000047592 | 3.72 | 0.003 | 0.51 | 0.049 |
| Ttc9 | ENSMUSG00000042734 | 3.71 | 0.001 | 0.54 | 0.034 |
| Gal3st2 | ENSMUSG00000094651 | 3.69 | 0.001 | 0.80 | 0.002 |
| Gm19935 | ENSMUSG00000110332 | 3.67 | <0.001 | 0.71 | 0.004 |
| Spag6l | ENSMUSG00000022783 | 3.64 | 0.031 | 0.54 | 0.034 |
| Wnt11 | ENSMUSG00000015957 | 3.63 | 0.007 | 0.67 | 0.007 |
| Paqr5 | ENSMUSG00000032278 | 3.63 | 0.003 | 0.56 | 0.027 |
| Dnah6 | ENSMUSG00000052861 | 3.63 | 0.033 | 0.58 | 0.023 |
| F13a1 | ENSMUSG00000039109 | 3.60 | <0.001 | 0.62 | 0.014 |
| Ccl8 | ENSMUSG00000009185 | 3.59 | 0.004 | 0.71 | 0.004 |
| Foxn1 | ENSMUSG00000002057 | 3.55 | 0.011 | 0.56 | 0.027 |
| Syt5 | ENSMUSG00000004961 | 3.49 | 0.011 | 0.52 | 0.045 |
| Gp9 | ENSMUSG00000030054 | 3.42 | 0.006 | 0.76 | 0.002 |
| Mmp7 | ENSMUSG00000018623 | 3.42 | 0.001 | 0.61 | 0.016 |
| Cxcl13 | ENSMUSG00000023078 | 3.40 | <0.001 | 0.71 | 0.005 |
| Tmem117 | ENSMUSG00000063296 | 3.40 | 0.001 | 0.68 | 0.007 |
| Klf5 | ENSMUSG00000005148 | 3.38 | <0.001 | 0.55 | 0.032 |
| S100b | ENSMUSG00000033208 | 3.37 | 0.010 | 0.51 | 0.046 |
| Shisa4 | ENSMUSG00000041889 | 3.30 | 0.004 | 0.54 | 0.033 |
| Sox8 | ENSMUSG00000024176 | 3.30 | 0.004 | 0.58 | 0.022 |
| Cldn4 | ENSMUSG00000047501 | 3.30 | 0.006 | 0.56 | 0.028 |
| Krt7 | ENSMUSG00000023039 | 3.25 | 0.001 | 0.59 | 0.021 |
| Gm16011 | ENSMUSG00000081303 | 3.24 | 0.008 | 0.51 | 0.046 |
| Krt19 | ENSMUSG00000020911 | 3.24 | <0.001 | 0.57 | 0.025 |
| Rhbdl2 | ENSMUSG00000043333 | 3.20 | 0.022 | 0.52 | 0.045 |
| Lrtm2 | ENSMUSG00000055003 | 3.20 | 0.013 | 0.54 | 0.034 |
| Alox12e | ENSMUSG00000018907 | 3.20 | 0.035 | 0.58 | 0.021 |
| Erich2 | ENSMUSG00000075302 | 3.18 | 0.012 | 0.64 | 0.011 |
| Ret | ENSMUSG00000030110 | 3.17 | 0.011 | 0.65 | 0.009 |
| Cnksr1 | ENSMUSG00000028841 | 3.15 | 0.004 | 0.52 | 0.045 |
| Aif1l | ENSMUSG00000001864 | 3.10 | 0.005 | 0.57 | 0.025 |
| Epn3 | ENSMUSG00000010080 | 3.08 | 0.001 | 0.64 | 0.010 |
| Bcas1 | ENSMUSG00000013523 | 3.06 | 0.015 | 0.51 | 0.046 |
| Cdh16 | ENSMUSG00000031881 | 3.06 | 0.008 | 0.56 | 0.027 |
| Scin | ENSMUSG00000002565 | 3.05 | 0.003 | 0.66 | 0.008 |
| Mmrn1 | ENSMUSG00000054641 | 3.03 | 0.009 | 0.53 | 0.039 |
| Fst | ENSMUSG00000021765 | 3.01 | <0.001 | 0.75 | 0.003 |
| Neurl1a | ENSMUSG00000006435 | 3.00 | 0.003 | 0.59 | 0.019 |
| Prss35 | ENSMUSG00000033491 | 2.99 | 0.011 | 0.53 | 0.040 |
| Aqp5 | ENSMUSG00000044217 | 2.97 | 0.002 | 0.68 | 0.007 |
| Bst1 | ENSMUSG00000029082 | 2.96 | <0.001 | 0.68 | 0.007 |
| Gm609 | ENSMUSG00000053182 | 2.94 | 0.003 | 0.59 | 0.019 |
| Klrg2 | ENSMUSG00000071537 | 2.94 | 0.030 | 0.59 | 0.020 |
| Chil3 | ENSMUSG00000040809 | 2.94 | 0.001 | 0.60 | 0.017 |
| Ccdc40 | ENSMUSG00000039963 | 2.92 | 0.017 | 0.55 | 0.030 |
| Il13ra2 | ENSMUSG00000031289 | 2.91 | 0.032 | 0.52 | 0.043 |
| Kcnh3 | ENSMUSG00000037579 | 2.91 | 0.006 | 0.65 | 0.010 |
| Efhb | ENSMUSG00000023931 | 2.90 | 0.007 | 0.57 | 0.025 |
| Sp6 | ENSMUSG00000038560 | 2.88 | 0.027 | 0.52 | 0.046 |
| Gli1 | ENSMUSG00000025407 | 2.87 | 0.021 | 0.59 | 0.020 |
| Pax8 | ENSMUSG00000026976 | 2.86 | 0.007 | 0.55 | 0.032 |
| Fut2 | ENSMUSG00000055978 | 2.86 | 0.003 | 0.64 | 0.011 |
| Lrrn4 | ENSMUSG00000043110 | 2.86 | 0.002 | 0.54 | 0.036 |
| Tff2 | ENSMUSG00000024028 | 2.82 | 0.002 | 0.53 | 0.039 |
| Degs2 | ENSMUSG00000021263 | 2.82 | 0.001 | 0.60 | 0.018 |
| Gprc5a | ENSMUSG00000046733 | 2.82 | 0.003 | 0.63 | 0.011 |
| Cfap69 | ENSMUSG00000040473 | 2.81 | 0.002 | 0.53 | 0.038 |
| Cracdl | ENSMUSG00000026090 | 2.81 | 0.001 | 0.61 | 0.015 |
| Ly6g6e | ENSMUSG00000013766 | 2.80 | 0.018 | 0.52 | 0.043 |
| Acta1 | ENSMUSG00000031972 | 2.80 | 0.023 | 0.65 | 0.009 |
| Dio3os | ENSMUSG00000113581 | 2.79 | 0.002 | 0.66 | 0.009 |
| Flrt3 | ENSMUSG00000051379 | 2.79 | 0.001 | 0.58 | 0.021 |
| Tesc | ENSMUSG00000029359 | 2.79 | 0.002 | 0.62 | 0.014 |
| Rasal1 | ENSMUSG00000029602 | 2.78 | 0.002 | 0.57 | 0.026 |
| Rnf208 | ENSMUSG00000044628 | 2.78 | 0.005 | 0.63 | 0.012 |
| Sfrp5 | ENSMUSG00000018822 | 2.76 | 0.008 | 0.59 | 0.020 |
| Pdpn | ENSMUSG00000028583 | 2.73 | 0.001 | 0.57 | 0.024 |
| Trem1 | ENSMUSG00000042265 | 2.72 | 0.016 | 0.52 | 0.041 |
| Lrrn1 | ENSMUSG00000034648 | 2.71 | 0.011 | 0.60 | 0.017 |
| Scn3b | ENSMUSG00000049281 | 2.71 | 0.015 | 0.59 | 0.019 |
| Thbs4 | ENSMUSG00000021702 | 2.70 | 0.034 | 0.73 | 0.003 |
| Ankrd55 | ENSMUSG00000049985 | 2.70 | 0.001 | 0.57 | 0.025 |
| Prss12 | ENSMUSG00000027978 | 2.70 | 0.004 | 0.58 | 0.022 |
| Nfe2l3 | ENSMUSG00000029832 | 2.70 | 0.004 | 0.59 | 0.019 |
| B3gnt7 | ENSMUSG00000079445 | 2.69 | 0.026 | 0.57 | 0.024 |
| Foxj1 | ENSMUSG00000034227 | 2.68 | 0.004 | 0.72 | 0.004 |
| Inava | ENSMUSG00000041605 | 2.67 | 0.013 | 0.54 | 0.035 |
| Pwwp3b | ENSMUSG00000042515 | 2.65 | 0.006 | 0.60 | 0.017 |
| Mak | ENSMUSG00000021363 | 2.65 | 0.002 | 0.79 | 0.002 |
| Dnah5 | ENSMUSG00000022262 | 2.65 | 0.006 | 0.59 | 0.019 |
| Cdh6 | ENSMUSG00000039385 | 2.63 | 0.002 | 0.57 | 0.024 |
| Tmem108 | ENSMUSG00000042757 | 2.63 | 0.001 | 0.66 | 0.008 |
| Klc3 | ENSMUSG00000040714 | 2.61 | 0.003 | 0.62 | 0.014 |
| Arhgef28 | ENSMUSG00000021662 | 2.61 | 0.001 | 0.59 | 0.019 |
| Itgb6 | ENSMUSG00000026971 | 2.61 | 0.003 | 0.63 | 0.012 |
| Ano9 | ENSMUSG00000054662 | 2.58 | 0.014 | 0.57 | 0.024 |
| Plxdc2 | ENSMUSG00000026748 | 2.57 | <0.001 | 0.69 | 0.005 |
| Kcnk1 | ENSMUSG00000033998 | 2.56 | 0.002 | 0.66 | 0.009 |
| Dusp18 | ENSMUSG00000047205 | 2.56 | 0.010 | 0.56 | 0.029 |
| Ppp2r2b | ENSMUSG00000024500 | 2.54 | 0.002 | 0.72 | 0.004 |
| Plekhs1 | ENSMUSG00000035818 | 2.54 | 0.011 | 0.56 | 0.026 |
| Cdh11 | ENSMUSG00000031673 | 2.53 | 0.007 | 0.53 | 0.040 |
| Cd24a | ENSMUSG00000047139 | 2.53 | 0.001 | 0.61 | 0.016 |
| Igkv8-28 | ENSMUSG00000094356 | 2.53 | 0.024 | 0.68 | 0.007 |
| Muc20 | ENSMUSG00000035638 | 2.53 | 0.021 | 0.54 | 0.035 |
| Ubxn10 | ENSMUSG00000043621 | 2.51 | 0.007 | 0.53 | 0.037 |
| Slc27a6 | ENSMUSG00000024600 | 2.51 | 0.001 | 0.71 | 0.004 |
| Rsph9 | ENSMUSG00000023966 | 2.51 | 0.003 | 0.65 | 0.009 |
| Mst1r | ENSMUSG00000032584 | 2.50 | 0.002 | 0.63 | 0.012 |
| Ms4a8a | ENSMUSG00000024730 | 2.47 | <0.001 | 0.63 | 0.013 |
| Ehf | ENSMUSG00000012350 | 2.46 | 0.003 | 0.57 | 0.024 |
| Sncg | ENSMUSG00000023064 | 2.46 | 0.002 | 0.53 | 0.038 |
| Cfap77 | ENSMUSG00000079502 | 2.46 | 0.007 | 0.64 | 0.011 |
| Igsf9b | ENSMUSG00000034275 | 2.46 | 0.007 | 0.51 | 0.047 |
| Fam83b | ENSMUSG00000032358 | 2.45 | 0.017 | 0.55 | 0.031 |
| Lamc2 | ENSMUSG00000026479 | 2.44 | 0.003 | 0.67 | 0.008 |
| Itgb4 | ENSMUSG00000020758 | 2.43 | 0.001 | 0.60 | 0.017 |
| Epdr1 | ENSMUSG00000002808 | 2.42 | 0.018 | 0.55 | 0.032 |
| Clic6 | ENSMUSG00000022949 | 2.42 | 0.002 | 0.61 | 0.015 |
| Bspry | ENSMUSG00000028392 | 2.41 | 0.007 | 0.54 | 0.034 |
| Spef2 | ENSMUSG00000072663 | 2.40 | 0.017 | 0.58 | 0.021 |
| Dab1 | ENSMUSG00000028519 | 2.40 | 0.021 | 0.55 | 0.030 |
| Eya2 | ENSMUSG00000017897 | 2.40 | 0.003 | 0.57 | 0.025 |
| Aldh1a2 | ENSMUSG00000013584 | 2.40 | 0.011 | 0.52 | 0.045 |
| Larp6 | ENSMUSG00000034839 | 2.40 | 0.013 | 0.53 | 0.039 |
| Wfdc18 | ENSMUSG00000000983 | 2.39 | 0.006 | 0.68 | 0.007 |
| Efna4 | ENSMUSG00000028040 | 2.39 | 0.041 | 0.62 | 0.013 |
| Ankrd1 | ENSMUSG00000024803 | 2.37 | 0.007 | 0.65 | 0.010 |
| S100a6 | ENSMUSG00000001025 | 2.37 | <0.001 | 0.65 | 0.010 |
| 9130008F23Rik | ENSMUSG00000054951 | 2.36 | 0.002 | 0.64 | 0.010 |
| Fxyd3 | ENSMUSG00000057092 | 2.36 | 0.009 | 0.57 | 0.023 |
| Enho | ENSMUSG00000028445 | 2.36 | 0.006 | 0.72 | 0.004 |
| Wasf3 | ENSMUSG00000029636 | 2.36 | 0.028 | 0.55 | 0.030 |
| Grhl2 | ENSMUSG00000022286 | 2.36 | 0.006 | 0.62 | 0.014 |
| Cftr | ENSMUSG00000041301 | 2.35 | 0.010 | 0.55 | 0.032 |
| Ap1m2 | ENSMUSG00000003309 | 2.34 | 0.003 | 0.63 | 0.013 |
| Ubash3a | ENSMUSG00000042345 | 2.32 | 0.001 | 0.70 | 0.005 |
| Tmem100 | ENSMUSG00000069763 | 2.32 | 0.026 | 0.51 | 0.047 |
| Col4a6 | ENSMUSG00000031273 | 2.32 | 0.008 | 0.51 | 0.047 |
| Myo5c | ENSMUSG00000033590 | 2.32 | 0.003 | 0.58 | 0.022 |
| Slc44a4 | ENSMUSG00000007034 | 2.31 | 0.002 | 0.68 | 0.007 |
| Sftpd | ENSMUSG00000021795 | 2.30 | 0.001 | 0.61 | 0.015 |
| Cd6 | ENSMUSG00000024670 | 2.30 | 0.001 | 0.56 | 0.027 |
| Syngr1 | ENSMUSG00000022415 | 2.30 | 0.001 | 0.73 | 0.003 |
| Sobp | ENSMUSG00000038248 | 2.29 | 0.011 | 0.59 | 0.020 |
| Hkdc1 | ENSMUSG00000020080 | 2.29 | 0.004 | 0.56 | 0.028 |
| Wnk2 | ENSMUSG00000037989 | 2.29 | 0.010 | 0.57 | 0.026 |
| Pak3 | ENSMUSG00000031284 | 2.29 | 0.042 | 0.62 | 0.014 |
| Pcdh11x | ENSMUSG00000034755 | 2.29 | 0.003 | 0.58 | 0.021 |
| Enah | ENSMUSG00000022995 | 2.28 | 0.004 | 0.67 | 0.008 |
| Tgfb2 | ENSMUSG00000039239 | 2.28 | 0.004 | 0.61 | 0.015 |
| Mfap2 | ENSMUSG00000060572 | 2.27 | 0.031 | 0.54 | 0.036 |
| Muc1 | ENSMUSG00000042784 | 2.27 | 0.001 | 0.55 | 0.030 |
| Cacna2d1 | ENSMUSG00000040118 | 2.27 | 0.008 | 0.56 | 0.028 |
| Phgdh | ENSMUSG00000053398 | 2.27 | 0.001 | 0.68 | 0.007 |
| Sertad4 | ENSMUSG00000016262 | 2.27 | 0.005 | 0.52 | 0.042 |
| Spns3 | ENSMUSG00000020798 | 2.26 | 0.005 | 0.60 | 0.017 |
| Cldn7 | ENSMUSG00000018569 | 2.25 | 0.001 | 0.62 | 0.015 |
| Fstl3 | ENSMUSG00000020325 | 2.25 | 0.006 | 0.61 | 0.015 |
| Chrnb1 | ENSMUSG00000041189 | 2.25 | 0.002 | 0.63 | 0.012 |
| Chrdl2 | ENSMUSG00000030732 | 2.24 | 0.003 | 0.65 | 0.010 |
| Mex3a | ENSMUSG00000074480 | 2.24 | 0.009 | 0.54 | 0.035 |
| Mal | ENSMUSG00000027375 | 2.24 | 0.001 | 0.69 | 0.006 |
| Tnk1 | ENSMUSG00000001583 | 2.24 | 0.037 | 0.54 | 0.034 |
| Reep2 | ENSMUSG00000038555 | 2.23 | 0.009 | 0.69 | 0.006 |
| Tspan8 | ENSMUSG00000034127 | 2.22 | 0.004 | 0.59 | 0.020 |
| Nrgn | ENSMUSG00000053310 | 2.22 | 0.001 | 0.70 | 0.005 |
| Cited4 | ENSMUSG00000070803 | 2.21 | 0.001 | 0.69 | 0.006 |
| Gm26608 | ENSMUSG00000097673 | 2.20 | 0.001 | 0.78 | 0.002 |
| Wnk4 | ENSMUSG00000035112 | 2.20 | <0.001 | 0.70 | 0.005 |
| Trpv4 | ENSMUSG00000014158 | 2.19 | 0.001 | 0.65 | 0.010 |
| Ifitm6 | ENSMUSG00000059108 | 2.19 | 0.001 | 0.65 | 0.010 |
| Prr15l | ENSMUSG00000047040 | 2.18 | 0.006 | 0.61 | 0.015 |
| AA986860 | ENSMUSG00000042510 | 2.18 | 0.010 | 0.53 | 0.038 |
| Erich5 | ENSMUSG00000044726 | 2.18 | 0.004 | 0.61 | 0.015 |
| Dclk1 | ENSMUSG00000027797 | 2.18 | 0.014 | 0.57 | 0.024 |
| Fjx1 | ENSMUSG00000075012 | 2.18 | 0.039 | 0.51 | 0.046 |
| Ppp1r26 | ENSMUSG00000035829 | 2.17 | 0.010 | 0.66 | 0.009 |
| Adgrg1 | ENSMUSG00000031785 | 2.17 | <0.001 | 0.77 | 0.002 |
| Adgrf1 | ENSMUSG00000041293 | 2.17 | 0.034 | 0.54 | 0.033 |
| Tubb1 | ENSMUSG00000016255 | 2.16 | 0.010 | 0.51 | 0.049 |
| Smim5 | ENSMUSG00000048442 | 2.16 | 0.005 | 0.65 | 0.010 |
| Susd3 | ENSMUSG00000021384 | 2.16 | 0.003 | 0.63 | 0.012 |
| Spint1 | ENSMUSG00000027315 | 2.16 | 0.005 | 0.60 | 0.017 |
| Epcam | ENSMUSG00000045394 | 2.15 | 0.003 | 0.59 | 0.019 |
| Trim16 | ENSMUSG00000047821 | 2.15 | 0.010 | 0.52 | 0.045 |
| Fmo2 | ENSMUSG00000040170 | 2.14 | <0.001 | 0.65 | 0.010 |
| Hs3st1 | ENSMUSG00000051022 | 2.13 | 0.003 | 0.65 | 0.009 |
| Zdhhc23 | ENSMUSG00000036304 | 2.13 | 0.001 | 0.69 | 0.006 |
| Shisal1 | ENSMUSG00000062760 | 2.13 | 0.019 | 0.64 | 0.010 |
| Vill | ENSMUSG00000038775 | 2.13 | <0.001 | 0.67 | 0.008 |
| Cd300lf | ENSMUSG00000047798 | 2.13 | 0.002 | 0.54 | 0.033 |
| Unc5cl | ENSMUSG00000043592 | 2.13 | 0.018 | 0.65 | 0.009 |
| Nme5 | ENSMUSG00000035984 | 2.13 | 0.038 | 0.59 | 0.019 |
| Ace | ENSMUSG00000020681 | 2.12 | 0.001 | 0.61 | 0.015 |
| Slit1 | ENSMUSG00000025020 | 2.12 | 0.001 | 0.64 | 0.010 |
| Gzmb | ENSMUSG00000015437 | 2.12 | 0.007 | 0.53 | 0.038 |
| Tigit | ENSMUSG00000071552 | 2.12 | 0.037 | 0.52 | 0.041 |
| Ltk | ENSMUSG00000027297 | 2.11 | 0.036 | 0.58 | 0.022 |
| Gm34030 | ENSMUSG00000109697 | 2.11 | 0.011 | 0.62 | 0.014 |
| Clca3a1 | ENSMUSG00000056025 | 2.11 | <0.001 | 0.61 | 0.015 |
| Epop | ENSMUSG00000043439 | 2.11 | 0.001 | 0.63 | 0.012 |
| Igsf9 | ENSMUSG00000037995 | 2.10 | 0.003 | 0.56 | 0.028 |
| Zfp641 | ENSMUSG00000022987 | 2.09 | 0.008 | 0.75 | 0.003 |
| Mcf2l | ENSMUSG00000031442 | 2.08 | 0.011 | 0.56 | 0.029 |
| Tmem266 | ENSMUSG00000032313 | 2.08 | 0.011 | 0.57 | 0.023 |
| Sgpp2 | ENSMUSG00000032908 | 2.08 | 0.012 | 0.51 | 0.048 |
| Cd101 | ENSMUSG00000086564 | 2.07 | 0.003 | 0.70 | 0.005 |
| Kif12 | ENSMUSG00000028357 | 2.07 | 0.003 | 0.64 | 0.011 |
| Lat | ENSMUSG00000030742 | 2.07 | <0.001 | 0.74 | 0.003 |
| Tspoap1 | ENSMUSG00000034156 | 2.06 | 0.004 | 0.64 | 0.011 |
| Mycbpap | ENSMUSG00000039110 | 2.06 | 0.010 | 0.59 | 0.019 |
| Igkv16-104 | ENSMUSG00000076522 | 2.06 | 0.039 | 0.64 | 0.011 |
| Arg2 | ENSMUSG00000021125 | 2.06 | 0.028 | 0.54 | 0.034 |
| Itgam | ENSMUSG00000030786 | 2.06 | 0.001 | 0.60 | 0.019 |
| Trbc1 | ENSMUSG00000076490 | 2.06 | 0.001 | 0.60 | 0.018 |
| Ighv5-17 | ENSMUSG00000095571 | 2.05 | 0.021 | 0.71 | 0.005 |
| Dnah2 | ENSMUSG00000005237 | 2.05 | 0.001 | 0.54 | 0.036 |
| Misp | ENSMUSG00000035852 | 2.05 | 0.003 | 0.62 | 0.014 |
| Zfp239 | ENSMUSG00000042097 | 2.05 | 0.008 | 0.61 | 0.016 |
| Cacnb3 | ENSMUSG00000003352 | 2.05 | 0.005 | 0.62 | 0.014 |
| Il1r1 | ENSMUSG00000026072 | 2.04 | 0.016 | 0.56 | 0.027 |
| Ppbp | ENSMUSG00000029372 | 2.04 | 0.007 | 0.69 | 0.006 |
| Rrad | ENSMUSG00000031880 | 2.03 | 0.001 | 0.74 | 0.003 |
| Celsr2 | ENSMUSG00000068740 | 2.03 | 0.004 | 0.59 | 0.020 |
| Pik3ip1 | ENSMUSG00000034614 | 2.03 | 0.005 | 0.62 | 0.014 |
| Gspt2 | ENSMUSG00000071723 | 2.03 | 0.001 | 0.76 | 0.002 |
| Mthfd1l | ENSMUSG00000040675 | 2.03 | 0.001 | 0.58 | 0.023 |
| Stk26 | ENSMUSG00000031112 | 2.03 | 0.002 | 0.57 | 0.023 |
| Epb41l4a | ENSMUSG00000024376 | 2.03 | 0.009 | 0.56 | 0.028 |
| Slain1 | ENSMUSG00000055717 | 2.02 | 0.003 | 0.62 | 0.014 |
| Bcam | ENSMUSG00000002980 | 2.02 | 0.001 | 0.61 | 0.016 |
| Plcd3 | ENSMUSG00000020937 | 2.02 | 0.001 | 0.61 | 0.015 |
| Spaca6 | ENSMUSG00000080316 | 2.02 | <0.001 | 0.72 | 0.004 |
| Sstr2 | ENSMUSG00000047904 | 2.02 | 0.037 | 0.63 | 0.012 |
| Sema5a | ENSMUSG00000022231 | 2.02 | 0.005 | 0.57 | 0.025 |
| Ptpn13 | ENSMUSG00000034573 | 2.01 | 0.003 | 0.63 | 0.013 |
| Foxred2 | ENSMUSG00000016552 | 2.01 | 0.002 | 0.65 | 0.010 |
| Pglyrp1 | ENSMUSG00000030413 | 2.01 | 0.009 | 0.59 | 0.020 |
| Spon1 | ENSMUSG00000038156 | 2.01 | 0.003 | 0.53 | 0.038 |
| Armcx4 | ENSMUSG00000049804 | 2.01 | <0.001 | 0.67 | 0.008 |
| Myo15b | ENSMUSG00000034427 | 2.00 | 0.004 | 0.56 | 0.026 |
| Ddr1 | ENSMUSG00000003534 | 2.00 | 0.004 | 0.60 | 0.017 |
| Fam167a | ENSMUSG00000035095 | 1.99 | 0.001 | 0.58 | 0.022 |
| Cdh1 | ENSMUSG00000000303 | 1.98 | 0.008 | 0.55 | 0.029 |
| Socs2 | ENSMUSG00000020027 | 1.98 | <0.001 | 0.62 | 0.015 |
| Nectin4 | ENSMUSG00000006411 | 1.98 | 0.007 | 0.57 | 0.024 |
| Casq1 | ENSMUSG00000007122 | 1.98 | 0.031 | 0.77 | 0.002 |
| Cacna1s | ENSMUSG00000026407 | 1.97 | 0.036 | 0.58 | 0.021 |
| Arhgap8 | ENSMUSG00000078954 | 1.97 | 0.012 | 0.53 | 0.038 |
| Ifitm10 | ENSMUSG00000045777 | 1.97 | 0.026 | 0.57 | 0.025 |
| Foxc1 | ENSMUSG00000050295 | 1.97 | 0.016 | 0.62 | 0.014 |
| Rgs11 | ENSMUSG00000024186 | 1.97 | 0.020 | 0.57 | 0.026 |
| Rgs18 | ENSMUSG00000026357 | 1.97 | 0.035 | 0.69 | 0.006 |
| Ugt8a | ENSMUSG00000032854 | 1.96 | 0.017 | 0.62 | 0.014 |
| Mcub | ENSMUSG00000027994 | 1.96 | 0.009 | 0.51 | 0.049 |
| Ccl6 | ENSMUSG00000018927 | 1.96 | 0.002 | 0.55 | 0.031 |
| Relt | ENSMUSG00000008318 | 1.96 | 0.003 | 0.64 | 0.011 |
| Reep1 | ENSMUSG00000052852 | 1.95 | 0.012 | 0.63 | 0.011 |
| Nkg7 | ENSMUSG00000004612 | 1.95 | 0.001 | 0.57 | 0.026 |
| Iqcd | ENSMUSG00000029601 | 1.95 | 0.021 | 0.53 | 0.037 |
| Cd33 | ENSMUSG00000004609 | 1.95 | 0.003 | 0.52 | 0.046 |
| Steap2 | ENSMUSG00000015653 | 1.94 | <0.001 | 0.67 | 0.008 |
| Odad1 | ENSMUSG00000040189 | 1.94 | 0.011 | 0.61 | 0.015 |
| Sirpb1c | ENSMUSG00000074677 | 1.94 | 0.002 | 0.64 | 0.011 |
| Rgs9bp | ENSMUSG00000056043 | 1.94 | 0.036 | 0.66 | 0.009 |
| Mok | ENSMUSG00000056458 | 1.94 | 0.011 | 0.75 | 0.003 |
| Pla2g7 | ENSMUSG00000023913 | 1.94 | <0.001 | 0.69 | 0.006 |
| A530040E14Rik | ENSMUSG00000072109 | 1.93 | 0.004 | 0.58 | 0.021 |
| Bdkrb2 | ENSMUSG00000021070 | 1.93 | 0.035 | 0.53 | 0.038 |
| Cdkn2a | ENSMUSG00000044303 | 1.93 | 0.004 | 0.58 | 0.021 |
| Cldn8 | ENSMUSG00000050520 | 1.93 | 0.011 | 0.56 | 0.027 |
| Scara3 | ENSMUSG00000034463 | 1.92 | 0.009 | 0.66 | 0.008 |
| Fndc7 | ENSMUSG00000045326 | 1.92 | 0.035 | 0.51 | 0.047 |
| Zfp184 | ENSMUSG00000006720 | 1.92 | 0.011 | 0.75 | 0.003 |
| Alox5ap | ENSMUSG00000060063 | 1.92 | 0.001 | 0.70 | 0.005 |
| Sirpb1b | ENSMUSG00000095028 | 1.92 | 0.007 | 0.55 | 0.030 |
| Atp10a | ENSMUSG00000025324 | 1.91 | 0.011 | 0.52 | 0.042 |
| Cd3e | ENSMUSG00000032093 | 1.91 | 0.003 | 0.51 | 0.048 |
| Lrrc75a | ENSMUSG00000046417 | 1.91 | 0.001 | 0.60 | 0.018 |
| St14 | ENSMUSG00000031995 | 1.90 | 0.015 | 0.54 | 0.035 |
| Kif19a | ENSMUSG00000010021 | 1.90 | 0.001 | 0.63 | 0.012 |
| Nipal2 | ENSMUSG00000038879 | 1.90 | 0.031 | 0.63 | 0.011 |
| Lepr | ENSMUSG00000057722 | 1.90 | 0.002 | 0.62 | 0.015 |
| Kcnq1 | ENSMUSG00000009545 | 1.90 | 0.001 | 0.64 | 0.011 |
| ccdc198 | ENSMUSG00000021850 | 1.90 | 0.011 | 0.54 | 0.035 |
| Fgfr1 | ENSMUSG00000031565 | 1.90 | 0.003 | 0.56 | 0.027 |
| Rdh9 | ENSMUSG00000056148 | 1.90 | 0.005 | 0.60 | 0.018 |
| Anxa13 | ENSMUSG00000055114 | 1.89 | 0.018 | 0.54 | 0.035 |
| Gm15931 | ENSMUSG00000081723 | 1.89 | 0.010 | 0.61 | 0.015 |
| Aph1c | ENSMUSG00000053040 | 1.89 | <0.001 | 0.77 | 0.002 |
| Mpp3 | ENSMUSG00000052373 | 1.89 | 0.032 | 0.56 | 0.027 |
| Dlg2 | ENSMUSG00000052572 | 1.88 | 0.022 | 0.58 | 0.022 |
| Slc35e4 | ENSMUSG00000048807 | 1.88 | 0.002 | 0.68 | 0.007 |
| Ang | ENSMUSG00000072115 | 1.88 | 0.003 | 0.55 | 0.032 |
| Dnah7b | ENSMUSG00000041144 | 1.87 | 0.016 | 0.60 | 0.018 |
| Cd200 | ENSMUSG00000022661 | 1.87 | 0.009 | 0.60 | 0.017 |
| Piwil2 | ENSMUSG00000033644 | 1.87 | 0.017 | 0.66 | 0.009 |
| Prx | ENSMUSG00000053198 | 1.87 | 0.018 | 0.51 | 0.047 |
| Syt15 | ENSMUSG00000041479 | 1.87 | 0.025 | 0.53 | 0.040 |
| Omp | ENSMUSG00000074006 | 1.87 | 0.025 | 0.57 | 0.024 |
| Sox12 | ENSMUSG00000051817 | 1.87 | 0.001 | 0.61 | 0.015 |
| Myrip | ENSMUSG00000041794 | 1.87 | 0.016 | 0.57 | 0.024 |
| Ezr | ENSMUSG00000052397 | 1.86 | <0.001 | 0.64 | 0.011 |
| Spn | ENSMUSG00000051457 | 1.86 | 0.001 | 0.61 | 0.015 |
| Mcemp1 | ENSMUSG00000013974 | 1.86 | 0.031 | 0.54 | 0.035 |
| Emilin2 | ENSMUSG00000024053 | 1.86 | <0.001 | 0.66 | 0.009 |
| Angptl7 | ENSMUSG00000028989 | 1.86 | 0.011 | 0.51 | 0.046 |
| Ifi205 | ENSMUSG00000054203 | 1.86 | 0.001 | 0.68 | 0.007 |
| Clec4n | ENSMUSG00000023349 | 1.85 | 0.002 | 0.56 | 0.027 |
| Rab27b | ENSMUSG00000024511 | 1.85 | 0.006 | 0.60 | 0.018 |
| Lama5 | ENSMUSG00000015647 | 1.85 | 0.003 | 0.56 | 0.027 |
| Marveld3 | ENSMUSG00000001672 | 1.85 | 0.002 | 0.61 | 0.015 |
| Mbp | ENSMUSG00000041607 | 1.85 | 0.003 | 0.63 | 0.012 |
| Gm46224 | ENSMUSG00000112843 | 1.85 | 0.020 | 0.59 | 0.020 |
| Tgm1 | ENSMUSG00000022218 | 1.85 | 0.001 | 0.51 | 0.046 |
| Kcne3 | ENSMUSG00000035165 | 1.84 | 0.013 | 0.55 | 0.032 |
| Rassf9 | ENSMUSG00000044921 | 1.84 | 0.006 | 0.61 | 0.015 |
| Tmem150b | ENSMUSG00000046456 | 1.84 | 0.009 | 0.58 | 0.022 |
| Garnl3 | ENSMUSG00000038860 | 1.84 | 0.023 | 0.69 | 0.006 |
| Dram1 | ENSMUSG00000020057 | 1.84 | 0.001 | 0.65 | 0.009 |
| Cd8a | ENSMUSG00000053977 | 1.84 | 0.003 | 0.54 | 0.034 |
| 5031434O11Rik | ENSMUSG00000097885 | 1.84 | 0.005 | 0.71 | 0.004 |
| Pmaip1 | ENSMUSG00000024521 | 1.83 | 0.001 | 0.67 | 0.007 |
| Slc41a3 | ENSMUSG00000030089 | 1.83 | 0.004 | 0.58 | 0.022 |
| Pi16 | ENSMUSG00000024011 | 1.83 | 0.004 | 0.62 | 0.014 |
| C7 | ENSMUSG00000079105 | 1.83 | 0.010 | 0.58 | 0.021 |
| L1cam | ENSMUSG00000031391 | 1.83 | 0.020 | 0.65 | 0.009 |
| Pdgfrl | ENSMUSG00000031595 | 1.83 | 0.007 | 0.63 | 0.012 |
| Raver2 | ENSMUSG00000035275 | 1.82 | 0.004 | 0.67 | 0.007 |
| Bicc1 | ENSMUSG00000014329 | 1.82 | 0.008 | 0.57 | 0.024 |
| Rnase4 | ENSMUSG00000021876 | 1.82 | 0.001 | 0.59 | 0.020 |
| Gm33543 | ENSMUSG00000110353 | 1.82 | 0.008 | 0.57 | 0.024 |
| Fcgr3 | ENSMUSG00000059498 | 1.82 | 0.001 | 0.59 | 0.019 |
| Lrrc75b | ENSMUSG00000046807 | 1.82 | 0.032 | 0.62 | 0.014 |
| Atp8a2 | ENSMUSG00000021983 | 1.82 | 0.003 | 0.66 | 0.009 |
| Ptgis | ENSMUSG00000017969 | 1.82 | 0.001 | 0.60 | 0.017 |
| Gpr18 | ENSMUSG00000050350 | 1.81 | 0.025 | 0.52 | 0.045 |
| Cds1 | ENSMUSG00000029330 | 1.81 | 0.001 | 0.57 | 0.023 |
| Pak6 | ENSMUSG00000074923 | 1.81 | 0.028 | 0.51 | 0.047 |
| Ctla2a | ENSMUSG00000044258 | 1.81 | 0.004 | 0.58 | 0.023 |
| Ubxn11 | ENSMUSG00000012126 | 1.81 | 0.017 | 0.58 | 0.022 |
| Mtcl1 | ENSMUSG00000052105 | 1.80 | 0.012 | 0.54 | 0.036 |
| Grap2 | ENSMUSG00000042351 | 1.80 | 0.001 | 0.61 | 0.015 |
| Pcp4l1 | ENSMUSG00000038370 | 1.80 | <0.001 | 0.66 | 0.008 |
| Ulk4 | ENSMUSG00000040936 | 1.80 | 0.012 | 0.55 | 0.030 |
| Glis3 | ENSMUSG00000052942 | 1.80 | 0.012 | 0.55 | 0.029 |
| Pard6g | ENSMUSG00000056214 | 1.80 | 0.003 | 0.63 | 0.012 |
| Edn1 | ENSMUSG00000021367 | 1.80 | 0.012 | 0.57 | 0.024 |
| Ppp1r3a | ENSMUSG00000042717 | 1.80 | 0.033 | 0.58 | 0.021 |
| Il18r1 | ENSMUSG00000026070 | 1.80 | 0.002 | 0.56 | 0.028 |
| Slc1a3 | ENSMUSG00000005360 | 1.80 | 0.003 | 0.56 | 0.027 |
| Atp1a3 | ENSMUSG00000040907 | 1.79 | 0.021 | 0.58 | 0.022 |
| Csf2rb2 | ENSMUSG00000071714 | 1.79 | 0.003 | 0.51 | 0.050 |
| Ift57 | ENSMUSG00000032965 | 1.79 | 0.002 | 0.64 | 0.011 |
| Bcl11b | ENSMUSG00000048251 | 1.79 | 0.006 | 0.57 | 0.023 |
| Scn1b | ENSMUSG00000019194 | 1.78 | 0.002 | 0.56 | 0.028 |
| Lck | ENSMUSG00000000409 | 1.78 | 0.002 | 0.53 | 0.038 |
| Slc14a1 | ENSMUSG00000059336 | 1.78 | 0.025 | 0.52 | 0.042 |
| Selp | ENSMUSG00000026580 | 1.77 | 0.012 | 0.60 | 0.017 |
| Mmp9 | ENSMUSG00000017737 | 1.77 | 0.022 | 0.59 | 0.021 |
| Fcho1 | ENSMUSG00000070000 | 1.77 | 0.005 | 0.72 | 0.004 |
| Col7a1 | ENSMUSG00000025650 | 1.77 | 0.023 | 0.55 | 0.031 |
| Ebf4 | ENSMUSG00000053552 | 1.77 | 0.004 | 0.80 | 0.002 |
| Napsa | ENSMUSG00000002204 | 1.77 | 0.001 | 0.58 | 0.023 |
| Gpx3 | ENSMUSG00000018339 | 1.77 | 0.010 | 0.52 | 0.043 |
| Igfbp2 | ENSMUSG00000039323 | 1.77 | 0.004 | 0.54 | 0.034 |
| Sptb | ENSMUSG00000021061 | 1.77 | 0.001 | 0.60 | 0.018 |
| Celf4 | ENSMUSG00000024268 | 1.76 | 0.003 | 0.59 | 0.019 |
| Atp6v0e2 | ENSMUSG00000039347 | 1.76 | 0.016 | 0.54 | 0.034 |
| Tmem221 | ENSMUSG00000043664 | 1.76 | 0.001 | 0.69 | 0.006 |
| B3galt4 | ENSMUSG00000067370 | 1.76 | 0.001 | 0.72 | 0.004 |
| Ankrd6 | ENSMUSG00000040183 | 1.76 | 0.016 | 0.54 | 0.036 |
| Serpinb6b | ENSMUSG00000042842 | 1.76 | 0.012 | 0.58 | 0.021 |
| Gpr34 | ENSMUSG00000040229 | 1.76 | 0.046 | 0.53 | 0.038 |
| Tmem132a | ENSMUSG00000024736 | 1.76 | 0.005 | 0.64 | 0.010 |
| Vtcn1 | ENSMUSG00000051076 | 1.75 | 0.007 | 0.55 | 0.031 |
| Ltb | ENSMUSG00000024399 | 1.75 | 0.004 | 0.65 | 0.010 |
| Gm27252 | ENSMUSG00000098708 | 1.75 | 0.018 | 0.56 | 0.027 |
| Dkk3 | ENSMUSG00000030772 | 1.75 | <0.001 | 0.73 | 0.003 |
| Ttc26 | ENSMUSG00000056832 | 1.75 | 0.009 | 0.59 | 0.019 |
| Galnt12 | ENSMUSG00000039774 | 1.74 | 0.006 | 0.59 | 0.019 |
| Ccr5 | ENSMUSG00000079227 | 1.74 | <0.001 | 0.59 | 0.020 |
| Lpcat4 | ENSMUSG00000027134 | 1.74 | 0.001 | 0.73 | 0.003 |
| Camkk1 | ENSMUSG00000020785 | 1.74 | 0.001 | 0.60 | 0.017 |
| H2-Q2 | ENSMUSG00000091705 | 1.74 | 0.022 | 0.56 | 0.026 |
| Plcd1 | ENSMUSG00000010660 | 1.74 | 0.026 | 0.55 | 0.032 |
| Dync2li1 | ENSMUSG00000024253 | 1.74 | 0.003 | 0.63 | 0.012 |
| Ptpn18 | ENSMUSG00000026126 | 1.73 | <0.001 | 0.67 | 0.007 |
| Lurap1 | ENSMUSG00000028701 | 1.73 | 0.001 | 0.73 | 0.003 |
| Mgat3 | ENSMUSG00000042428 | 1.73 | 0.025 | 0.53 | 0.039 |
| Gfra2 | ENSMUSG00000022103 | 1.73 | 0.005 | 0.57 | 0.024 |
| Rac3 | ENSMUSG00000018012 | 1.73 | 0.009 | 0.54 | 0.036 |
| Map3k9 | ENSMUSG00000042724 | 1.73 | 0.007 | 0.63 | 0.012 |
| Lilr4b | ENSMUSG00000112023 | 1.73 | 0.003 | 0.60 | 0.017 |
| Enpp6 | ENSMUSG00000038173 | 1.73 | <0.001 | 0.73 | 0.003 |
| Adgrg5 | ENSMUSG00000061577 | 1.73 | 0.002 | 0.66 | 0.008 |
| Dnaaf3 | ENSMUSG00000055809 | 1.73 | 0.001 | 0.67 | 0.007 |
| Car13 | ENSMUSG00000027555 | 1.73 | 0.009 | 0.52 | 0.045 |
| Pdk3 | ENSMUSG00000035232 | 1.73 | <0.001 | 0.70 | 0.005 |
| Slc2a3 | ENSMUSG00000003153 | 1.73 | 0.001 | 0.65 | 0.010 |
| Fut4 | ENSMUSG00000049307 | 1.72 | <0.001 | 0.71 | 0.004 |
| Dcdc2a | ENSMUSG00000035910 | 1.72 | 0.020 | 0.59 | 0.019 |
| Tespa1 | ENSMUSG00000034833 | 1.72 | 0.047 | 0.57 | 0.024 |
| Ltbp2 | ENSMUSG00000002020 | 1.72 | 0.019 | 0.59 | 0.019 |
| Card9 | ENSMUSG00000026928 | 1.72 | 0.001 | 0.56 | 0.028 |
| Vsig4 | ENSMUSG00000044206 | 1.72 | 0.001 | 0.61 | 0.015 |
| Tspan4 | ENSMUSG00000025511 | 1.72 | 0.001 | 0.53 | 0.040 |
| Basp1 | ENSMUSG00000045763 | 1.72 | 0.003 | 0.57 | 0.026 |
| Hotairm1 | ENSMUSG00000087658 | 1.72 | <0.001 | 0.76 | 0.002 |
| Gramd1b | ENSMUSG00000040111 | 1.72 | 0.002 | 0.58 | 0.022 |
| Dtx1 | ENSMUSG00000029603 | 1.71 | 0.002 | 0.77 | 0.002 |
| Itpr3 | ENSMUSG00000042644 | 1.71 | 0.001 | 0.71 | 0.004 |
| Dlgap3 | ENSMUSG00000042388 | 1.71 | 0.031 | 0.52 | 0.045 |
| C230013L11Rik | ENSMUSG00000117171 | 1.71 | 0.002 | 0.70 | 0.005 |
| Tspan13 | ENSMUSG00000020577 | 1.71 | <0.001 | 0.72 | 0.004 |
| AB124611 | ENSMUSG00000057191 | 1.71 | <0.001 | 0.62 | 0.014 |
| Smc1b | ENSMUSG00000022432 | 1.71 | 0.012 | 0.62 | 0.014 |
| Tlr13 | ENSMUSG00000033777 | 1.71 | 0.001 | 0.56 | 0.026 |
| Ptpn22 | ENSMUSG00000027843 | 1.71 | <0.001 | 0.62 | 0.014 |
| Ccdc148 | ENSMUSG00000036641 | 1.71 | 0.005 | 0.59 | 0.020 |
| Mfsd2b | ENSMUSG00000037336 | 1.71 | 0.001 | 0.65 | 0.010 |
| Jdp2 | ENSMUSG00000034271 | 1.71 | 0.006 | 0.59 | 0.019 |
| Crip1 | ENSMUSG00000006360 | 1.71 | 0.001 | 0.59 | 0.020 |
| Alox12 | ENSMUSG00000000320 | 1.70 | 0.002 | 0.55 | 0.032 |
| Gem | ENSMUSG00000028214 | 1.70 | 0.001 | 0.56 | 0.026 |
| Galnt3 | ENSMUSG00000026994 | 1.70 | 0.003 | 0.61 | 0.015 |
| Smarcd3 | ENSMUSG00000028949 | 1.70 | 0.021 | 0.60 | 0.017 |
| Tnfaip8l2 | ENSMUSG00000013707 | 1.70 | 0.001 | 0.64 | 0.011 |
| Kcnab2 | ENSMUSG00000028931 | 1.70 | <0.001 | 0.64 | 0.011 |
| Glis2 | ENSMUSG00000014303 | 1.69 | 0.004 | 0.61 | 0.016 |
| Ppp1r1b | ENSMUSG00000061718 | 1.69 | 0.006 | 0.64 | 0.011 |
| Lax1 | ENSMUSG00000051998 | 1.69 | 0.029 | 0.59 | 0.019 |
| Pdp1 | ENSMUSG00000049225 | 1.69 | 0.009 | 0.62 | 0.015 |
| Samd14 | ENSMUSG00000047181 | 1.69 | 0.040 | 0.52 | 0.045 |
| Apobec3 | ENSMUSG00000009585 | 1.69 | <0.001 | 0.69 | 0.006 |
| Slco3a1 | ENSMUSG00000025790 | 1.69 | 0.005 | 0.56 | 0.028 |
| Cebpd | ENSMUSG00000071637 | 1.69 | 0.016 | 0.57 | 0.025 |
| Fcgr4 | ENSMUSG00000059089 | 1.69 | 0.002 | 0.54 | 0.035 |
| Gm5112 | ENSMUSG00000107868 | 1.68 | 0.016 | 0.57 | 0.024 |
| Ust | ENSMUSG00000047712 | 1.68 | 0.002 | 0.56 | 0.026 |
| Fam131a | ENSMUSG00000050821 | 1.68 | 0.012 | 0.56 | 0.026 |
| Satb1 | ENSMUSG00000023927 | 1.68 | 0.032 | 0.59 | 0.020 |
| Tlr11 | ENSMUSG00000051969 | 1.68 | 0.024 | 0.51 | 0.049 |
| Fry | ENSMUSG00000056602 | 1.68 | 0.004 | 0.65 | 0.009 |
| Tmem156 | ENSMUSG00000037913 | 1.68 | 0.010 | 0.57 | 0.024 |
| Nod2 | ENSMUSG00000055994 | 1.68 | 0.003 | 0.51 | 0.047 |
| Rab11fip5 | ENSMUSG00000051343 | 1.68 | 0.004 | 0.67 | 0.008 |
| Hspa2 | ENSMUSG00000059970 | 1.68 | 0.002 | 0.55 | 0.031 |
| Gm49760 | ENSMUSG00000116815 | 1.68 | 0.017 | 0.64 | 0.011 |
| Rab19 | ENSMUSG00000029923 | 1.68 | 0.002 | 0.63 | 0.013 |
| 2610035D17Rik | ENSMUSG00000087259 | 1.68 | 0.014 | 0.52 | 0.043 |
| P2ry12 | ENSMUSG00000036353 | 1.67 | 0.002 | 0.60 | 0.017 |
| BC064078 | ENSMUSG00000087150 | 1.67 | 0.014 | 0.71 | 0.004 |
| Thy1 | ENSMUSG00000032011 | 1.67 | <0.001 | 0.66 | 0.009 |
| Wfdc17 | ENSMUSG00000069792 | 1.67 | 0.003 | 0.56 | 0.027 |
| Fgl2 | ENSMUSG00000039899 | 1.66 | 0.001 | 0.64 | 0.011 |
| Pla2g4a | ENSMUSG00000056220 | 1.66 | 0.001 | 0.64 | 0.011 |
| Pycard | ENSMUSG00000030793 | 1.66 | <0.001 | 0.68 | 0.007 |
| Rps15-ps2 | ENSMUSG00000071419 | 1.66 | 0.013 | 0.55 | 0.031 |
| Smim6 | ENSMUSG00000075420 | 1.66 | 0.006 | 0.51 | 0.049 |
| Emb | ENSMUSG00000021728 | 1.66 | 0.009 | 0.54 | 0.033 |
| Cysltr1 | ENSMUSG00000052821 | 1.66 | 0.001 | 0.63 | 0.012 |
| Sestd1 | ENSMUSG00000042272 | 1.66 | 0.001 | 0.64 | 0.010 |
| Gm4419 | ENSMUSG00000097055 | 1.66 | 0.008 | 0.71 | 0.004 |
| Gpr55 | ENSMUSG00000049608 | 1.66 | 0.037 | 0.52 | 0.042 |
| Cd2 | ENSMUSG00000027863 | 1.66 | 0.019 | 0.57 | 0.024 |
| Gm47815 | ENSMUSG00000111171 | 1.65 | 0.037 | 0.57 | 0.026 |
| Klra2 | ENSMUSG00000030187 | 1.65 | 0.003 | 0.55 | 0.029 |
| Chp2 | ENSMUSG00000030865 | 1.65 | 0.003 | 0.57 | 0.024 |
| Apba1 | ENSMUSG00000024897 | 1.65 | 0.001 | 0.60 | 0.017 |
| Kcnab3 | ENSMUSG00000018470 | 1.65 | 0.014 | 0.54 | 0.036 |
| Inpp4b | ENSMUSG00000037940 | 1.65 | 0.001 | 0.69 | 0.005 |
| C130050O18Rik | ENSMUSG00000044092 | 1.65 | <0.001 | 0.62 | 0.014 |
| Noxo1 | ENSMUSG00000019320 | 1.64 | 0.005 | 0.58 | 0.022 |
| Mefv | ENSMUSG00000022534 | 1.64 | 0.005 | 0.61 | 0.016 |
| Il12rb1 | ENSMUSG00000000791 | 1.64 | 0.020 | 0.57 | 0.025 |
| Adrb1 | ENSMUSG00000035283 | 1.64 | 0.001 | 0.57 | 0.024 |
| Kcnj16 | ENSMUSG00000051497 | 1.64 | 0.009 | 0.52 | 0.041 |
| Hap1 | ENSMUSG00000006930 | 1.64 | 0.002 | 0.66 | 0.008 |
| Runx3 | ENSMUSG00000070691 | 1.64 | 0.004 | 0.57 | 0.025 |
| Gsn | ENSMUSG00000026879 | 1.64 | 0.016 | 0.63 | 0.012 |
| Anxa3 | ENSMUSG00000029484 | 1.64 | 0.005 | 0.53 | 0.038 |
| Arhgap9 | ENSMUSG00000040345 | 1.64 | <0.001 | 0.66 | 0.008 |
| Lilrb4a | ENSMUSG00000112148 | 1.64 | 0.003 | 0.58 | 0.023 |
| Drc3 | ENSMUSG00000056598 | 1.64 | 0.018 | 0.61 | 0.016 |
| Auts2 | ENSMUSG00000029673 | 1.64 | 0.018 | 0.62 | 0.014 |
| Cytip | ENSMUSG00000026832 | 1.64 | 0.006 | 0.57 | 0.025 |
| Ppil6 | ENSMUSG00000078451 | 1.64 | 0.024 | 0.66 | 0.009 |
| Enkd1 | ENSMUSG00000013155 | 1.64 | 0.010 | 0.65 | 0.009 |
| Lsp1 | ENSMUSG00000018819 | 1.63 | 0.001 | 0.67 | 0.007 |
| Padi2 | ENSMUSG00000028927 | 1.63 | <0.001 | 0.67 | 0.008 |
| AI467606 | ENSMUSG00000045165 | 1.63 | 0.002 | 0.71 | 0.004 |
| Fhad1 | ENSMUSG00000051435 | 1.63 | 0.002 | 0.65 | 0.010 |
| Ptk7 | ENSMUSG00000023972 | 1.63 | 0.039 | 0.52 | 0.041 |
| Folr2 | ENSMUSG00000032725 | 1.63 | 0.003 | 0.57 | 0.025 |
| Cxcr4 | ENSMUSG00000045382 | 1.63 | 0.017 | 0.53 | 0.040 |
| Cd96 | ENSMUSG00000022657 | 1.63 | 0.024 | 0.69 | 0.005 |
| Mustn1 | ENSMUSG00000042485 | 1.63 | 0.003 | 0.53 | 0.037 |
| Pirb | ENSMUSG00000058818 | 1.62 | 0.003 | 0.53 | 0.039 |
| Nfatc4 | ENSMUSG00000023411 | 1.62 | 0.012 | 0.55 | 0.030 |
| Dapp1 | ENSMUSG00000028159 | 1.62 | 0.001 | 0.65 | 0.009 |
| Ctsk | ENSMUSG00000028111 | 1.62 | 0.012 | 0.60 | 0.017 |
| Atp11a | ENSMUSG00000031441 | 1.62 | <0.001 | 0.63 | 0.013 |
| Gvin3 | ENSMUSG00000073902 | 1.62 | 0.001 | 0.64 | 0.011 |
| Runx1 | ENSMUSG00000022952 | 1.62 | 0.006 | 0.52 | 0.042 |
| Vangl2 | ENSMUSG00000026556 | 1.62 | 0.001 | 0.78 | 0.002 |
| Gmpr | ENSMUSG00000000253 | 1.62 | 0.025 | 0.69 | 0.005 |
| Zfp618 | ENSMUSG00000028358 | 1.62 | 0.016 | 0.53 | 0.040 |
| Cyp1b1 | ENSMUSG00000024087 | 1.61 | 0.037 | 0.53 | 0.039 |
| Ptprcap | ENSMUSG00000045826 | 1.61 | 0.005 | 0.57 | 0.025 |
| Slc9a5 | ENSMUSG00000014786 | 1.61 | 0.005 | 0.57 | 0.024 |
| Lrfn1 | ENSMUSG00000030600 | 1.61 | 0.019 | 0.67 | 0.008 |
| Flywch2 | ENSMUSG00000023911 | 1.61 | 0.006 | 0.62 | 0.015 |
| Vsig10 | ENSMUSG00000066894 | 1.61 | 0.015 | 0.58 | 0.023 |
| Slc8a1 | ENSMUSG00000054640 | 1.61 | <0.001 | 0.65 | 0.010 |
| Nfam1 | ENSMUSG00000058099 | 1.61 | <0.001 | 0.60 | 0.018 |
| Nek5 | ENSMUSG00000037738 | 1.61 | 0.040 | 0.52 | 0.041 |
| Sh3bgrl3 | ENSMUSG00000028843 | 1.61 | <0.001 | 0.70 | 0.005 |
| Cd5l | ENSMUSG00000015854 | 1.61 | 0.003 | 0.53 | 0.037 |
| Peg3 | ENSMUSG00000002265 | 1.60 | 0.002 | 0.59 | 0.020 |
| Marchf1 | ENSMUSG00000036469 | 1.60 | 0.002 | 0.60 | 0.017 |
| Nxpe4 | ENSMUSG00000044229 | 1.60 | 0.001 | 0.62 | 0.014 |
| 1700088E04Rik | ENSMUSG00000033029 | 1.60 | 0.033 | 0.56 | 0.028 |
| Clec2i | ENSMUSG00000030365 | 1.60 | 0.001 | 0.67 | 0.007 |
| Nlrc3 | ENSMUSG00000049871 | 1.60 | 0.003 | 0.66 | 0.008 |
| Il7r | ENSMUSG00000003882 | 1.60 | 0.001 | 0.64 | 0.011 |
| Csf3r | ENSMUSG00000028859 | 1.60 | 0.004 | 0.67 | 0.008 |
| Phf24 | ENSMUSG00000036062 | 1.60 | 0.039 | 0.62 | 0.014 |
| Pdlim4 | ENSMUSG00000020388 | 1.60 | 0.003 | 0.68 | 0.007 |
| Clec10a | ENSMUSG00000000318 | 1.60 | 0.030 | 0.52 | 0.044 |
| Tspan6 | ENSMUSG00000067377 | 1.60 | 0.041 | 0.56 | 0.028 |
| Runx2 | ENSMUSG00000039153 | 1.59 | 0.019 | 0.55 | 0.031 |
| Slc2a6 | ENSMUSG00000036067 | 1.59 | 0.032 | 0.53 | 0.038 |
| Txk | ENSMUSG00000054892 | 1.59 | 0.013 | 0.55 | 0.032 |
| Eif5a2 | ENSMUSG00000050192 | 1.59 | 0.016 | 0.60 | 0.018 |
| Rfx2 | ENSMUSG00000024206 | 1.59 | 0.005 | 0.63 | 0.013 |
| Gdpd5 | ENSMUSG00000035314 | 1.59 | 0.014 | 0.57 | 0.025 |
| Ripk3 | ENSMUSG00000022221 | 1.59 | <0.001 | 0.73 | 0.003 |
| Tnfaip8 | ENSMUSG00000062210 | 1.59 | <0.001 | 0.71 | 0.004 |
| Sfxn3 | ENSMUSG00000025212 | 1.59 | 0.003 | 0.64 | 0.011 |
| Milr1 | ENSMUSG00000040528 | 1.59 | 0.003 | 0.54 | 0.034 |
| Stx3 | ENSMUSG00000041488 | 1.59 | 0.004 | 0.58 | 0.023 |
| Spsb1 | ENSMUSG00000039911 | 1.59 | 0.013 | 0.53 | 0.041 |
| Cyba | ENSMUSG00000006519 | 1.59 | 0.001 | 0.64 | 0.010 |
| Arid5a | ENSMUSG00000037447 | 1.59 | 0.012 | 0.51 | 0.050 |
| Adam23 | ENSMUSG00000025964 | 1.59 | <0.001 | 0.67 | 0.008 |
| Sorbs3 | ENSMUSG00000022091 | 1.58 | 0.003 | 0.54 | 0.034 |
| Plac8 | ENSMUSG00000029322 | 1.58 | 0.002 | 0.62 | 0.014 |
| Tcea2 | ENSMUSG00000059540 | 1.58 | 0.012 | 0.64 | 0.011 |
| Gm14221 | ENSMUSG00000078956 | 1.58 | 0.006 | 0.57 | 0.025 |
| Akr1b10 | ENSMUSG00000061758 | 1.58 | 0.001 | 0.67 | 0.008 |
| Itgae | ENSMUSG00000005947 | 1.58 | 0.002 | 0.67 | 0.008 |
| Bin2 | ENSMUSG00000098112 | 1.58 | 0.002 | 0.52 | 0.045 |
| Fgr | ENSMUSG00000028874 | 1.58 | 0.005 | 0.58 | 0.021 |
| Tbx3os1 | ENSMUSG00000087516 | 1.58 | 0.029 | 0.57 | 0.024 |
| Nrtn | ENSMUSG00000039481 | 1.58 | 0.002 | 0.59 | 0.019 |
| Sting1 | ENSMUSG00000024349 | 1.58 | <0.001 | 0.70 | 0.005 |
| Treml2 | ENSMUSG00000071068 | 1.58 | 0.026 | 0.57 | 0.023 |
| Igsf6 | ENSMUSG00000035004 | 1.58 | 0.005 | 0.62 | 0.014 |
| Ncf1 | ENSMUSG00000015950 | 1.58 | <0.001 | 0.73 | 0.003 |
| Rasgef1b | ENSMUSG00000089809 | 1.58 | <0.001 | 0.59 | 0.020 |
| Orai2 | ENSMUSG00000039747 | 1.58 | 0.001 | 0.66 | 0.009 |
| Lair1 | ENSMUSG00000055541 | 1.58 | 0.001 | 0.65 | 0.010 |
| Kazn | ENSMUSG00000040606 | 1.57 | 0.003 | 0.51 | 0.047 |
| Grk4 | ENSMUSG00000052783 | 1.57 | 0.002 | 0.55 | 0.031 |
| Got1 | ENSMUSG00000025190 | 1.57 | 0.007 | 0.57 | 0.025 |
| Cyfip2 | ENSMUSG00000020340 | 1.57 | <0.001 | 0.74 | 0.003 |
| Adgrg2 | ENSMUSG00000031298 | 1.57 | 0.016 | 0.58 | 0.022 |
| Rab36 | ENSMUSG00000020175 | 1.57 | 0.016 | 0.54 | 0.033 |
| Spic | ENSMUSG00000004359 | 1.57 | 0.024 | 0.55 | 0.031 |
| Zfp354c | ENSMUSG00000044807 | 1.57 | 0.012 | 0.55 | 0.032 |
| SCF | ENSMUSG00000019966 | 1.57 | 0.001 | 0.72 | 0.004 |
| Hdac9 | ENSMUSG00000004698 | 1.57 | 0.012 | 0.59 | 0.019 |
| P2ry13 | ENSMUSG00000036362 | 1.57 | 0.001 | 0.58 | 0.023 |
| Lyl1 | ENSMUSG00000034041 | 1.57 | 0.008 | 0.59 | 0.020 |
| Cpt1c | ENSMUSG00000007783 | 1.57 | 0.021 | 0.52 | 0.041 |
| Nlgn2 | ENSMUSG00000051790 | 1.56 | 0.002 | 0.59 | 0.019 |
| Galnt15 | ENSMUSG00000021903 | 1.56 | 0.005 | 0.65 | 0.010 |
| Isyna1 | ENSMUSG00000019139 | 1.56 | 0.001 | 0.59 | 0.020 |
| Numbl | ENSMUSG00000063160 | 1.56 | 0.006 | 0.67 | 0.008 |
| Niban1 | ENSMUSG00000026483 | 1.56 | 0.001 | 0.65 | 0.009 |
| Msr1 | ENSMUSG00000025044 | 1.56 | <0.001 | 0.67 | 0.008 |
| Tspan3 | ENSMUSG00000032324 | 1.56 | 0.006 | 0.58 | 0.022 |
| Gcnt1 | ENSMUSG00000038843 | 1.56 | 0.005 | 0.59 | 0.020 |
| Spi1 | ENSMUSG00000002111 | 1.56 | 0.001 | 0.65 | 0.009 |
| Prune2 | ENSMUSG00000039126 | 1.56 | 0.018 | 0.59 | 0.019 |
| Carmil2 | ENSMUSG00000050357 | 1.56 | 0.014 | 0.58 | 0.023 |
| Epb41l3 | ENSMUSG00000024044 | 1.56 | 0.003 | 0.58 | 0.022 |
| Parvg | ENSMUSG00000022439 | 1.55 | 0.010 | 0.60 | 0.017 |
| Arhgap19 | ENSMUSG00000025154 | 1.55 | 0.001 | 0.72 | 0.004 |
| Ctss | ENSMUSG00000038642 | 1.55 | 0.001 | 0.61 | 0.015 |
| Palm | ENSMUSG00000035863 | 1.55 | 0.008 | 0.67 | 0.007 |
| Il6ra | ENSMUSG00000027947 | 1.55 | 0.017 | 0.53 | 0.037 |
| Casp4 | ENSMUSG00000033538 | 1.55 | 0.002 | 0.64 | 0.010 |
| Crispld2 | ENSMUSG00000031825 | 1.55 | 0.031 | 0.53 | 0.039 |
| Fermt3 | ENSMUSG00000024965 | 1.55 | 0.001 | 0.64 | 0.011 |
| Fam189b | ENSMUSG00000032657 | 1.55 | <0.001 | 0.83 | 0.001 |
| Dmpk | ENSMUSG00000030409 | 1.55 | 0.001 | 0.65 | 0.010 |
| Rgs14 | ENSMUSG00000052087 | 1.55 | 0.011 | 0.56 | 0.026 |
| Adamts7 | ENSMUSG00000032363 | 1.55 | 0.013 | 0.59 | 0.020 |
| Prkar2b | ENSMUSG00000002997 | 1.55 | 0.034 | 0.53 | 0.037 |
| Ncf4 | ENSMUSG00000071715 | 1.55 | 0.004 | 0.59 | 0.019 |
| Trps1 | ENSMUSG00000038679 | 1.55 | 0.001 | 0.64 | 0.011 |
| Ltb4r1 | ENSMUSG00000046908 | 1.55 | 0.023 | 0.61 | 0.016 |
| Tbc1d9 | ENSMUSG00000031709 | 1.55 | 0.002 | 0.64 | 0.010 |
| Nucb2 | ENSMUSG00000030659 | 1.54 | 0.011 | 0.53 | 0.040 |
| Batf | ENSMUSG00000034266 | 1.54 | 0.006 | 0.60 | 0.018 |
| Mmgt2 | ENSMUSG00000048497 | 1.54 | <0.001 | 0.77 | 0.002 |
| Pdgfc | ENSMUSG00000028019 | 1.54 | 0.002 | 0.66 | 0.009 |
| A930007A09Rik | ENSMUSG00000118559 | 1.54 | 0.020 | 0.66 | 0.009 |
| Ap1s2 | ENSMUSG00000031367 | 1.54 | 0.001 | 0.60 | 0.018 |
| Itgb2 | ENSMUSG00000000290 | 1.54 | 0.001 | 0.62 | 0.014 |
| Rims3 | ENSMUSG00000032890 | 1.54 | 0.008 | 0.51 | 0.047 |
| Plp2 | ENSMUSG00000031146 | 1.54 | 0.019 | 0.54 | 0.035 |
| Stx11 | ENSMUSG00000039232 | 1.54 | 0.003 | 0.62 | 0.015 |
| Rbm3 | ENSMUSG00000031167 | 1.54 | 0.002 | 0.58 | 0.021 |
| Slc1a5 | ENSMUSG00000001918 | 1.54 | 0.002 | 0.67 | 0.008 |
| Mical1 | ENSMUSG00000019823 | 1.54 | 0.001 | 0.73 | 0.003 |
| Arl4c | ENSMUSG00000049866 | 1.54 | 0.001 | 0.61 | 0.015 |
| C1qb | ENSMUSG00000036905 | 1.53 | 0.001 | 0.65 | 0.009 |
| Plcl1 | ENSMUSG00000038349 | 1.53 | <0.001 | 0.67 | 0.008 |
| Spred3 | ENSMUSG00000037239 | 1.53 | 0.002 | 0.60 | 0.018 |
| Lfng | ENSMUSG00000029570 | 1.53 | <0.001 | 0.58 | 0.022 |
| Dynlt1b | ENSMUSG00000096255 | 1.53 | 0.002 | 0.64 | 0.011 |
| Stk17b | ENSMUSG00000026094 | 1.53 | 0.001 | 0.56 | 0.027 |
| Vopp1 | ENSMUSG00000037788 | 1.53 | 0.001 | 0.55 | 0.032 |
| Def6 | ENSMUSG00000002257 | 1.53 | 0.013 | 0.59 | 0.019 |
| 1110025M09Rik | ENSMUSG00000103520 | 1.53 | 0.009 | 0.74 | 0.003 |
| Fbln1 | ENSMUSG00000006369 | 1.53 | 0.013 | 0.73 | 0.003 |
| Nfatc2 | ENSMUSG00000027544 | 1.53 | 0.026 | 0.52 | 0.042 |
| Cbx6 | ENSMUSG00000089715 | 1.53 | 0.003 | 0.67 | 0.008 |
| Abcc1 | ENSMUSG00000023088 | 1.52 | 0.003 | 0.57 | 0.024 |
| Gm49759 | ENSMUSG00000111394 | 1.52 | 0.004 | 0.62 | 0.014 |
| Nemp2 | ENSMUSG00000043015 | 1.52 | 0.014 | 0.66 | 0.009 |
| Emp3 | ENSMUSG00000040212 | 1.52 | 0.004 | 0.61 | 0.015 |
| Vav1 | ENSMUSG00000034116 | 1.52 | 0.001 | 0.57 | 0.025 |
| Pmp22 | ENSMUSG00000018217 | 1.52 | 0.003 | 0.64 | 0.011 |
| Tspan15 | ENSMUSG00000037031 | 1.52 | 0.004 | 0.63 | 0.012 |
| Mapk8ip1 | ENSMUSG00000027223 | 1.52 | 0.009 | 0.54 | 0.034 |
| Adamdec1 | ENSMUSG00000022057 | 1.52 | 0.011 | 0.58 | 0.022 |
| Fgd2 | ENSMUSG00000024013 | 1.52 | 0.001 | 0.66 | 0.009 |
| Aph1b | ENSMUSG00000032375 | 1.52 | 0.003 | 0.70 | 0.005 |
| Gpm6b | ENSMUSG00000031342 | 1.52 | 0.034 | 0.60 | 0.018 |
| Slc4a8 | ENSMUSG00000023032 | 1.52 | 0.003 | 0.65 | 0.009 |
| I830077J02Rik | ENSMUSG00000074342 | 1.52 | 0.018 | 0.53 | 0.038 |
| Gm47766 | ENSMUSG00000112336 | 1.52 | 0.017 | 0.56 | 0.029 |
| Vwf | ENSMUSG00000001930 | 1.52 | 0.013 | 0.53 | 0.038 |
| Il10ra | ENSMUSG00000032089 | 1.52 | 0.001 | 0.66 | 0.009 |
| Gimap3 | ENSMUSG00000039264 | 1.52 | 0.010 | 0.57 | 0.024 |
| Meis3 | ENSMUSG00000041420 | 1.52 | 0.005 | 0.57 | 0.025 |
| Clec4f | ENSMUSG00000014542 | 1.52 | 0.004 | 0.55 | 0.029 |
| Atp2a3 | ENSMUSG00000020788 | 1.52 | 0.013 | 0.57 | 0.025 |
| Ramp1 | ENSMUSG00000034353 | 1.52 | 0.004 | 0.59 | 0.019 |
| Sh3bp1 | ENSMUSG00000022436 | 1.51 | 0.001 | 0.73 | 0.003 |
| Fam217b | ENSMUSG00000070476 | 1.51 | 0.004 | 0.57 | 0.025 |
| Aldh3b1 | ENSMUSG00000024885 | 1.51 | 0.004 | 0.61 | 0.015 |
| C130026I21Rik | ENSMUSG00000052477 | 1.51 | 0.020 | 0.53 | 0.037 |
| Tspyl3 | ENSMUSG00000074671 | 1.51 | 0.004 | 0.52 | 0.045 |
| Dok3 | ENSMUSG00000035711 | 1.51 | 0.002 | 0.64 | 0.011 |
| Rnf145 | ENSMUSG00000019189 | 1.51 | <0.001 | 0.74 | 0.003 |
| Cd300c2 | ENSMUSG00000044811 | 1.51 | 0.004 | 0.60 | 0.017 |
| Lamc3 | ENSMUSG00000026840 | 1.51 | 0.030 | 0.52 | 0.045 |
| Smtnl2 | ENSMUSG00000045667 | 1.51 | 0.027 | 0.53 | 0.040 |
| Selplg | ENSMUSG00000048163 | 1.51 | 0.001 | 0.63 | 0.012 |
| Slc22a17 | ENSMUSG00000022199 | 1.51 | 0.009 | 0.59 | 0.020 |
| Wtip | ENSMUSG00000036459 | 1.51 | 0.001 | 0.70 | 0.005 |
| Mgat4a | ENSMUSG00000026110 | 1.51 | 0.004 | 0.54 | 0.035 |
| Cd80 | ENSMUSG00000075122 | 1.51 | 0.018 | 0.54 | 0.036 |
| Pik3cg | ENSMUSG00000020573 | 1.51 | 0.001 | 0.58 | 0.022 |
| Hck | ENSMUSG00000003283 | 1.51 | 0.005 | 0.57 | 0.025 |
| Itk | ENSMUSG00000020395 | 1.51 | 0.007 | 0.60 | 0.017 |
| Entpd1 | ENSMUSG00000048120 | 1.51 | 0.005 | 0.58 | 0.022 |
| Ctsw | ENSMUSG00000024910 | 1.50 | 0.009 | 0.54 | 0.033 |
| Lrrc25 | ENSMUSG00000049988 | 1.50 | 0.008 | 0.56 | 0.028 |
| Skap1 | ENSMUSG00000057058 | 1.50 | 0.018 | 0.60 | 0.019 |
| Ms4a6c | ENSMUSG00000079419 | 1.50 | 0.006 | 0.58 | 0.022 |
| Zfp52 | ENSMUSG00000051341 | 1.50 | 0.003 | 0.56 | 0.029 |
| Fcna | ENSMUSG00000026938 | 1.50 | 0.016 | 0.56 | 0.028 |
|  |  |  |  |  |  |
| Mup-ps7 | ENSMUSG00000094743 | -6.69 | <0.001 | -0.79 | 0.002 |
| Mup9 | ENSMUSG00000078686 | -5.65 | 0.001 | -0.73 | 0.003 |
| Obox4-ps3 | ENSMUSG00000099242 | -4.36 | <0.001 | -0.74 | 0.003 |
| Sult3a2 | ENSMUSG00000090298 | -4.09 | 0.001 | -0.57 | 0.023 |
| Mup17 | ENSMUSG00000096688 | -3.84 | 0.016 | -0.75 | 0.003 |
| Mup1 | ENSMUSG00000078683 | -3.71 | 0.009 | -0.69 | 0.006 |
| Mup15 | ENSMUSG00000096674 | -3.39 | 0.043 | -0.74 | 0.003 |
| Mup-ps2 | ENSMUSG00000073840 | -3.35 | 0.001 | -0.74 | 0.003 |
| Mup11 | ENSMUSG00000073834 | -3.28 | 0.005 | -0.73 | 0.003 |
| Mup-ps4 | ENSMUSG00000078685 | -3.09 | 0.007 | -0.73 | 0.003 |
| Sult2a7 | ENSMUSG00000094156 | -3.05 | 0.008 | -0.59 | 0.019 |
| Mup19 | ENSMUSG00000078673 | -3.02 | 0.007 | -0.72 | 0.004 |
| Nat8f7 | ENSMUSG00000089694 | -2.96 | 0.035 | -0.57 | 0.025 |
| Mup13 | ENSMUSG00000089873 | -2.81 | 0.026 | -0.72 | 0.004 |
| Aqp4 | ENSMUSG00000024411 | -2.75 | <0.001 | -0.75 | 0.003 |
| Lrrc19 | ENSMUSG00000049799 | -2.64 | 0.004 | -0.59 | 0.019 |
| Gm35164 | ENSMUSG00000114818 | -2.61 | 0.014 | -0.57 | 0.025 |
| Mup-ps14 | ENSMUSG00000082065 | -2.61 | 0.016 | -0.70 | 0.005 |
| Mup22 | ENSMUSG00000110439 | -2.56 | 0.018 | -0.71 | 0.005 |
| Flacc1 | ENSMUSG00000047528 | -2.52 | 0.004 | -0.52 | 0.045 |
| Fam50b | ENSMUSG00000038246 | -2.48 | 0.003 | -0.64 | 0.011 |
| Gm3953 | ENSMUSG00000111326 | -2.47 | 0.005 | -0.63 | 0.012 |
| Mup16 | ENSMUSG00000078675 | -2.41 | 0.019 | -0.65 | 0.010 |
| Mup-ps12 | ENSMUSG00000073835 | -2.30 | 0.046 | -0.67 | 0.008 |
| Gm45865 | ENSMUSG00000110456 | -2.30 | 0.011 | -0.61 | 0.016 |
| BC049987 | ENSMUSG00000110755 | -2.28 | <0.001 | -0.65 | 0.010 |
| Sfmbt2 | ENSMUSG00000061186 | -2.27 | 0.002 | -0.61 | 0.015 |
| Gm12602 | ENSMUSG00000085569 | -2.26 | 0.003 | -0.62 | 0.014 |
| Mup-ps16 | ENSMUSG00000090090 | -2.14 | 0.020 | -0.58 | 0.022 |
| Gpam | ENSMUSG00000024978 | -2.14 | <0.001 | -0.72 | 0.004 |
| Slc15a5 | ENSMUSG00000044378 | -2.12 | <0.001 | -0.67 | 0.008 |
| Mup2 | ENSMUSG00000078688 | -2.11 | 0.001 | -0.74 | 0.003 |
| Gm45847 | ENSMUSG00000109814 | -2.09 | 0.032 | -0.58 | 0.022 |
| Gm2065 | ENSMUSG00000102882 | -2.05 | 0.037 | -0.60 | 0.018 |
| Gm47789 | ENSMUSG00000110838 | -2.05 | 0.004 | -0.62 | 0.015 |
| Sult2a8 | ENSMUSG00000030378 | -2.03 | 0.001 | -0.65 | 0.010 |
| Mrgprb11-ps | ENSMUSG00000099889 | -2.01 | 0.002 | -0.56 | 0.027 |
| Mvd | ENSMUSG00000006517 | -2.01 | 0.001 | -0.51 | 0.046 |
| Trhde | ENSMUSG00000050663 | -2.01 | <0.001 | -0.76 | 0.002 |
| Gm32063 | ENSMUSG00000114247 | -2.00 | 0.003 | -0.63 | 0.013 |
| Gm45086 | ENSMUSG00000109170 | -1.98 | 0.002 | -0.54 | 0.033 |
| Gm38398 | ENSMUSG00000111774 | -1.96 | 0.027 | -0.60 | 0.017 |
| Fasn | ENSMUSG00000025153 | -1.94 | 0.013 | -0.56 | 0.026 |
| H3c15 | ENSMUSG00000081058 | -1.93 | 0.003 | -0.55 | 0.032 |
| Gm44427 | ENSMUSG00000108206 | -1.92 | 0.037 | -0.52 | 0.041 |
| Gdf15 | ENSMUSG00000038508 | -1.91 | 0.012 | -0.59 | 0.020 |
| Slc28a1 | ENSMUSG00000025726 | -1.90 | 0.003 | -0.58 | 0.021 |
| Acly | ENSMUSG00000020917 | -1.89 | 0.030 | -0.56 | 0.028 |
| H4c14 | ENSMUSG00000091405 | -1.89 | 0.021 | -0.59 | 0.019 |
| Gm47528 | ENSMUSG00000111282 | -1.89 | 0.048 | -0.51 | 0.049 |
| Elovl6 | ENSMUSG00000041220 | -1.88 | 0.044 | -0.53 | 0.038 |
| Dnah11 | ENSMUSG00000018581 | -1.88 | 0.015 | -0.55 | 0.031 |
| Gm48342 | ENSMUSG00000114934 | -1.88 | 0.001 | -0.70 | 0.005 |
| Aqp8 | ENSMUSG00000030762 | -1.88 | 0.047 | -0.54 | 0.034 |
| Gm37729 | ENSMUSG00000103222 | -1.87 | 0.001 | -0.60 | 0.018 |
| Mogat1 | ENSMUSG00000012187 | -1.85 | 0.012 | -0.69 | 0.006 |
| Raet1e | ENSMUSG00000053219 | -1.84 | 0.001 | -0.78 | 0.002 |
| Gm14296 | ENSMUSG00000074527 | -1.84 | 0.020 | -0.64 | 0.011 |
| Gm13775 | ENSMUSG00000081207 | -1.82 | 0.039 | -0.60 | 0.018 |
| Ralgps1 | ENSMUSG00000038831 | -1.81 | <0.001 | -0.63 | 0.012 |
| Gm49668 | ENSMUSG00000116718 | -1.77 | 0.016 | -0.56 | 0.027 |
| Tnfrsf22 | ENSMUSG00000010751 | -1.77 | 0.002 | -0.59 | 0.020 |
| Ddx25 | ENSMUSG00000032101 | -1.77 | 0.042 | -0.54 | 0.035 |
| Car3 | ENSMUSG00000027559 | -1.77 | 0.003 | -0.64 | 0.011 |
| Cyp2f2 | ENSMUSG00000052974 | -1.77 | 0.002 | -0.78 | 0.002 |
| Gm8163 | ENSMUSG00000084331 | -1.76 | 0.015 | -0.54 | 0.035 |
| Gm34280 | ENSMUSG00000109559 | -1.76 | 0.001 | -0.57 | 0.025 |
| Rassf6 | ENSMUSG00000029370 | -1.76 | <0.001 | -0.72 | 0.004 |
| 1810008I18Rik | ENSMUSG00000100094 | -1.76 | 0.023 | -0.53 | 0.037 |
| BC035947 | ENSMUSG00000090486 | -1.76 | 0.030 | -0.70 | 0.005 |
| B4galnt3 | ENSMUSG00000041372 | -1.75 | 0.008 | -0.54 | 0.033 |
| Raet1d | ENSMUSG00000078452 | -1.75 | 0.001 | -0.74 | 0.003 |
| Fdps | ENSMUSG00000059743 | -1.74 | 0.001 | -0.52 | 0.042 |
| Gm45866 | ENSMUSG00000110684 | -1.73 | 0.002 | -0.63 | 0.012 |
| Gm10433 | ENSMUSG00000072884 | -1.73 | 0.004 | -0.61 | 0.015 |
| Ugt1a5 | ENSMUSG00000089943 | -1.73 | <0.001 | -0.64 | 0.010 |
| Cyp2b10 | ENSMUSG00000030483 | -1.73 | 0.039 | -0.53 | 0.040 |
| Sc5d | ENSMUSG00000032018 | -1.72 | 0.001 | -0.66 | 0.009 |
| Gm15622 | ENSMUSG00000085834 | -1.72 | 0.001 | -0.52 | 0.043 |
| H2-K2 | ENSMUSG00000067203 | -1.72 | 0.001 | -0.60 | 0.017 |
| Gm47078 | ENSMUSG00000112275 | -1.71 | 0.026 | -0.59 | 0.020 |
| Thrsp | ENSMUSG00000035686 | -1.71 | 0.017 | -0.51 | 0.047 |
| Dct | ENSMUSG00000022129 | -1.70 | 0.019 | -0.58 | 0.023 |
| Gm10327 | ENSMUSG00000071343 | -1.69 | 0.006 | -0.58 | 0.023 |
| Mas1 | ENSMUSG00000068037 | -1.69 | 0.013 | -0.60 | 0.018 |
| Gm21885 | ENSMUSG00000094091 | -1.69 | 0.020 | -0.59 | 0.019 |
| Clstn3 | ENSMUSG00000008153 | -1.69 | 0.003 | -0.69 | 0.006 |
| Rdh11 | ENSMUSG00000066441 | -1.68 | 0.001 | -0.56 | 0.027 |
| Mdfic2 | ENSMUSG00000090667 | -1.68 | 0.002 | -0.70 | 0.005 |
| Nudt7 | ENSMUSG00000031767 | -1.68 | 0.002 | -0.63 | 0.012 |
| Gm30931 | ENSMUSG00000110035 | -1.67 | 0.013 | -0.52 | 0.045 |
| Hmgcs1 | ENSMUSG00000093930 | -1.66 | <0.001 | -0.59 | 0.020 |
| Stap1 | ENSMUSG00000029254 | -1.66 | 0.007 | -0.67 | 0.007 |
| Acacb | ENSMUSG00000042010 | -1.65 | 0.004 | -0.68 | 0.007 |
| Aacs | ENSMUSG00000029482 | -1.65 | 0.017 | -0.57 | 0.023 |
| 9130409I23Rik | ENSMUSG00000038768 | -1.65 | 0.025 | -0.61 | 0.015 |
| D630024D03Rik | ENSMUSG00000085772 | -1.65 | 0.032 | -0.51 | 0.049 |
| Gngt1 | ENSMUSG00000029663 | -1.65 | 0.026 | -0.62 | 0.013 |
| Pstpip2 | ENSMUSG00000025429 | -1.65 | <0.001 | -0.57 | 0.023 |
| Ces3a | ENSMUSG00000069922 | -1.65 | 0.002 | -0.67 | 0.008 |
| 5830462I19Rik | ENSMUSG00000091102 | -1.65 | 0.022 | -0.51 | 0.049 |
| Gm17196 | ENSMUSG00000090708 | -1.64 | 0.009 | -0.66 | 0.009 |
| Cyp2a21-ps | ENSMUSG00000108487 | -1.63 | 0.033 | -0.56 | 0.027 |
| Cyp46a1 | ENSMUSG00000021259 | -1.63 | 0.009 | -0.58 | 0.022 |
| Gm5182 | ENSMUSG00000111942 | -1.62 | 0.022 | -0.58 | 0.023 |
| Gm12265 | ENSMUSG00000085132 | -1.61 | 0.034 | -0.65 | 0.010 |
| Gale | ENSMUSG00000028671 | -1.60 | 0.021 | -0.57 | 0.024 |
| 4732419C18Rik | ENSMUSG00000097203 | -1.60 | 0.001 | -0.70 | 0.005 |
| Acaca | ENSMUSG00000020532 | -1.59 | 0.014 | -0.57 | 0.024 |
| Rarres1 | ENSMUSG00000049404 | -1.59 | 0.003 | -0.63 | 0.012 |
| Cyp2c40 | ENSMUSG00000025004 | -1.58 | 0.015 | -0.61 | 0.015 |
| C730002L08Rik | ENSMUSG00000114469 | -1.58 | 0.003 | -0.59 | 0.020 |
| Dhcr7 | ENSMUSG00000058454 | -1.58 | 0.001 | -0.53 | 0.039 |
| 9030619P08Rik | ENSMUSG00000053168 | -1.57 | 0.035 | -0.60 | 0.017 |
| Gm36435 | ENSMUSG00000111074 | -1.57 | 0.050 | -0.56 | 0.028 |
| Gm11788 | ENSMUSG00000086929 | -1.56 | 0.006 | -0.65 | 0.010 |
| Sgk2 | ENSMUSG00000017868 | -1.56 | 0.001 | -0.76 | 0.002 |
| Gm2788 | ENSMUSG00000085995 | -1.55 | 0.017 | -0.58 | 0.022 |
| Aldh1b1 | ENSMUSG00000035561 | -1.54 | 0.003 | -0.62 | 0.014 |
| Gm44005 | ENSMUSG00000107624 | -1.54 | 0.020 | -0.58 | 0.021 |
| Cyp4f14 | ENSMUSG00000024292 | -1.54 | 0.004 | -0.62 | 0.013 |
| Gm43691 | ENSMUSG00000104776 | -1.53 | 0.039 | -0.58 | 0.022 |
| Barhl1 | ENSMUSG00000026805 | -1.53 | 0.029 | -0.59 | 0.020 |
| Gm26588 | ENSMUSG00000097730 | -1.52 | 0.041 | -0.54 | 0.035 |
| Fam13a | ENSMUSG00000037709 | -1.52 | 0.005 | -0.56 | 0.028 |
| Gpd1 | ENSMUSG00000023019 | -1.52 | 0.001 | -0.77 | 0.002 |
| Cyp2d36-ps | ENSMUSG00000116341 | -1.51 | 0.018 | -0.54 | 0.036 |
| Eepd1 | ENSMUSG00000036611 | -1.51 | <0.001 | -0.65 | 0.010 |
| Gm4952 | ENSMUSG00000071633 | -1.51 | 0.020 | -0.57 | 0.025 |
| Gm9949 | ENSMUSG00000054589 | -1.51 | 0.009 | -0.58 | 0.021 |
| Mlxipl | ENSMUSG00000005373 | -1.51 | 0.001 | -0.61 | 0.015 |
| Sdf2l1 | ENSMUSG00000022769 | -1.50 | 0.012 | -0.62 | 0.014 |
| Tlcd2 | ENSMUSG00000038217 | -1.50 | 0.007 | -0.61 | 0.015 |
| Sigmar1 | ENSMUSG00000036078 | -1.50 | 0.003 | -0.58 | 0.022 |

**
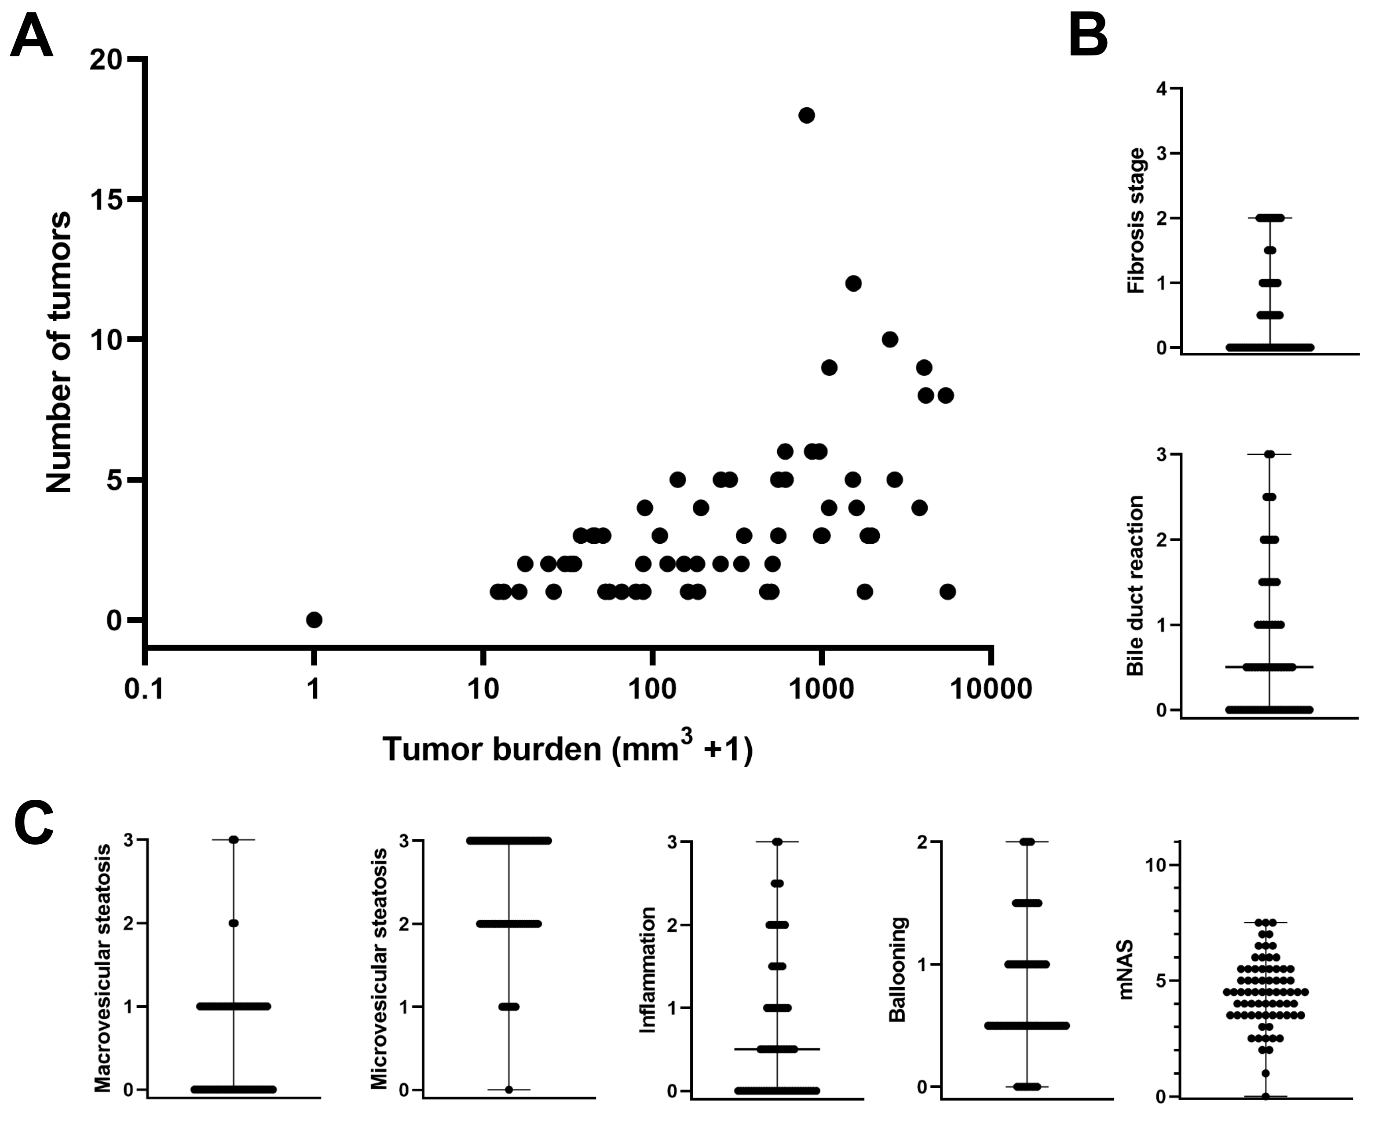
Supplementary Figure S1** Liver tumor and liver histology characteristics for the 71 Hep*Pten-* female mice. **(A)** Scatterplot showing number of tumors and tumor burden (mm3) per mouse observed in the 71 female Hep*Pten*- validation mice. Liver histological parameter scores for **(B)** liver fibrosis, bile ductural reaction and for **(C)** MASH parameters in these 71 mice. Median and range bars are shown.
